# Supplementary material for: PR/SET Domain Family and Cancer: Novel Insights from The Cancer Genome Atlas
Source: MDPI journal article supplement (doi:10.3390/ijms19103250), 2018-10-19

## SUPPLEMENTARY FILE\_S1

**Oncostrip plots** – The Oncostrip graphs show the distribution of all the mutations in the selected genes across the cohort of mutated patients. The colors indicate the variant classification of the mutations.

Below are the graphs concerning the following tumors in order: ACC, BLCA, BRCA, CESC, CHOL, COAD, DLBC, ESCA, HNSC, KICH, KIRC, KIRP, LAML, LIHC, LUAD, LUSC, OV, PAAD, PCPG, PRAD, READ, SARC, SKCM, STAD, TGCT, THCA, THYM, UCEC, UCS, UVM.

Altered in 51 (55.43%) of 92 samples.

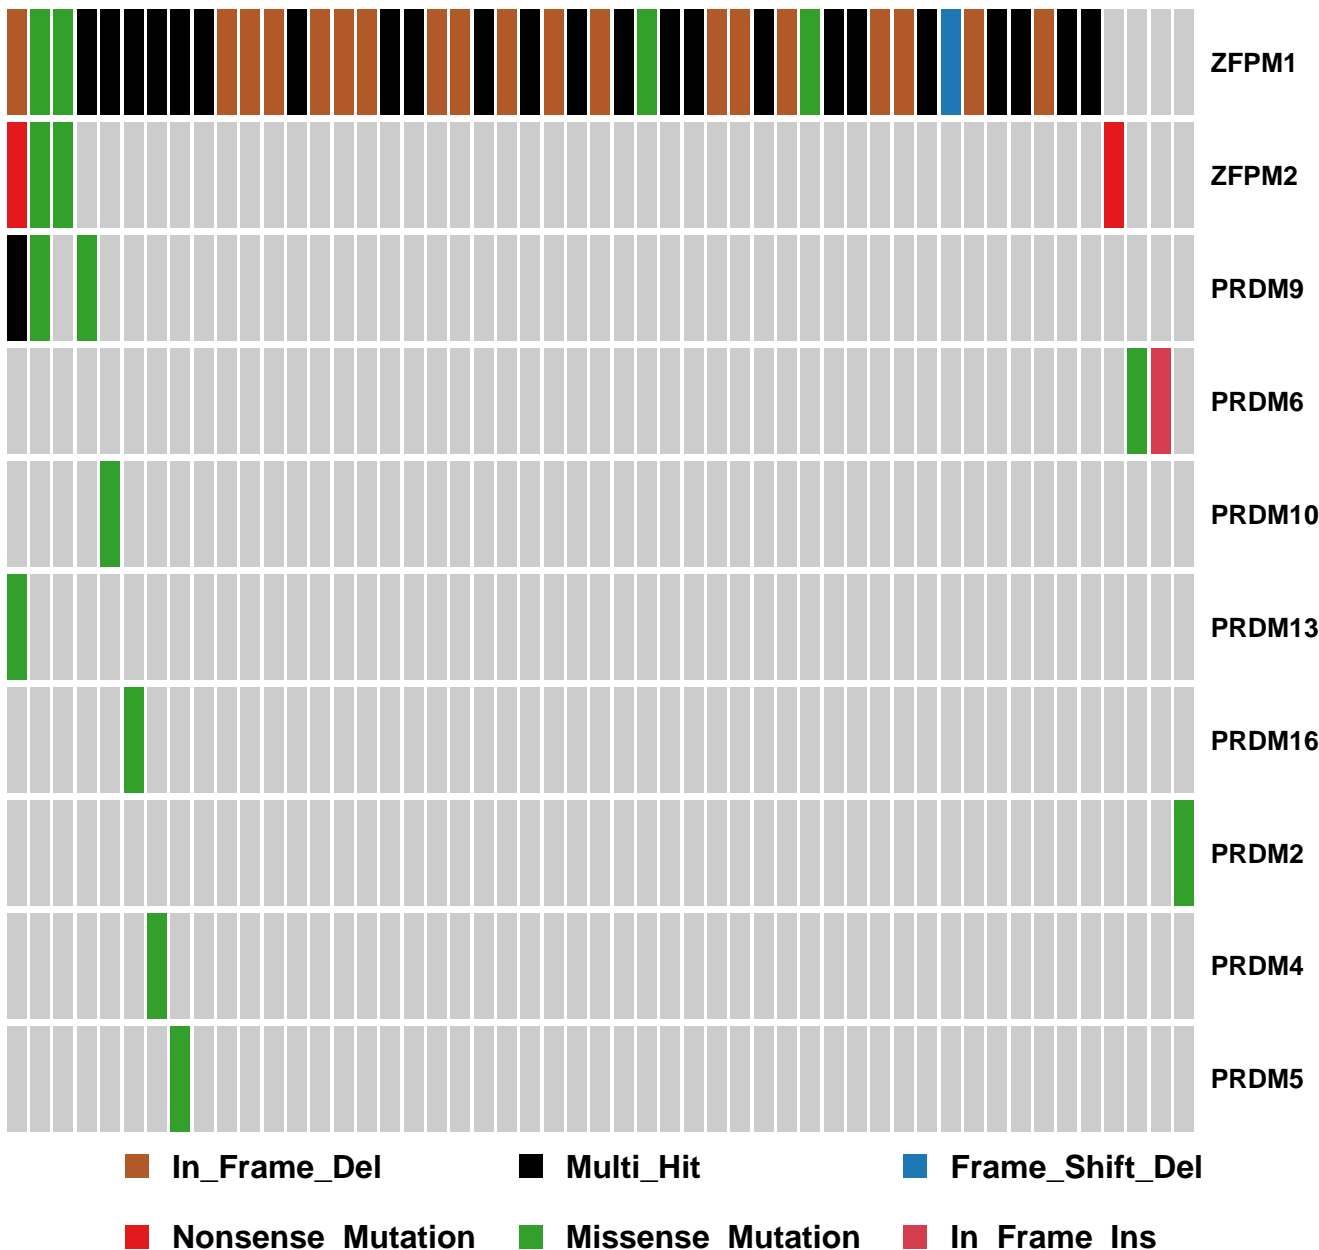

Altered in 127 (30.75%) of 413 samples.

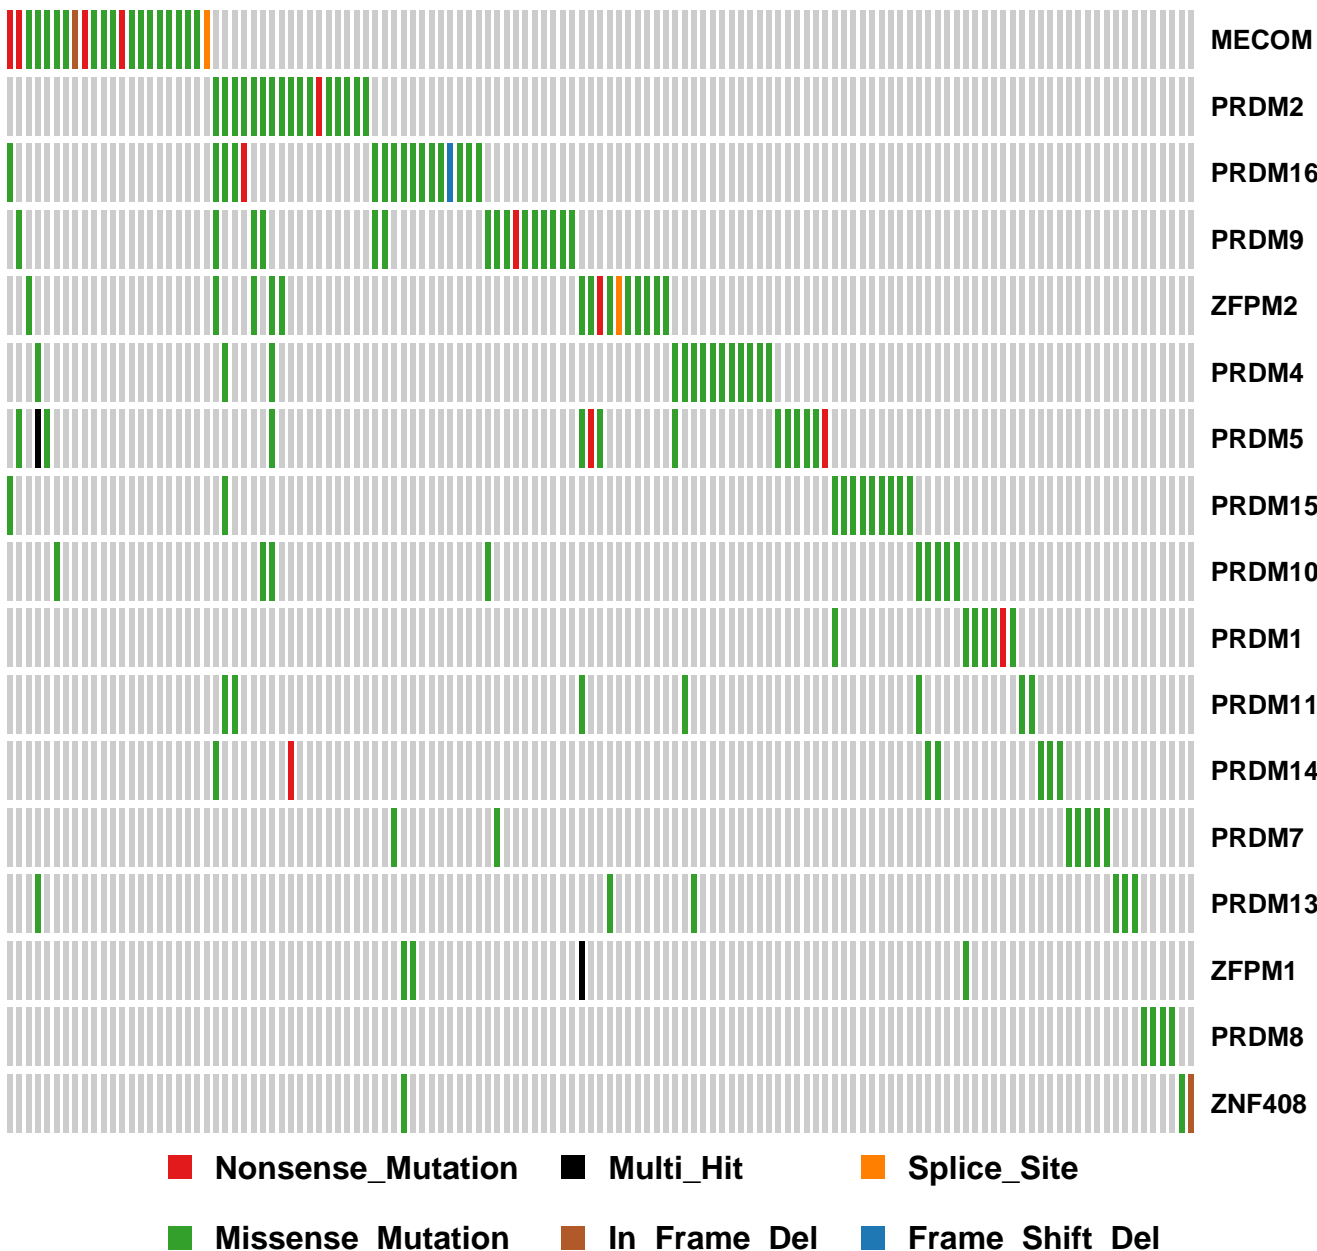

Altered in 84 (8.34%) of 1007 samples.

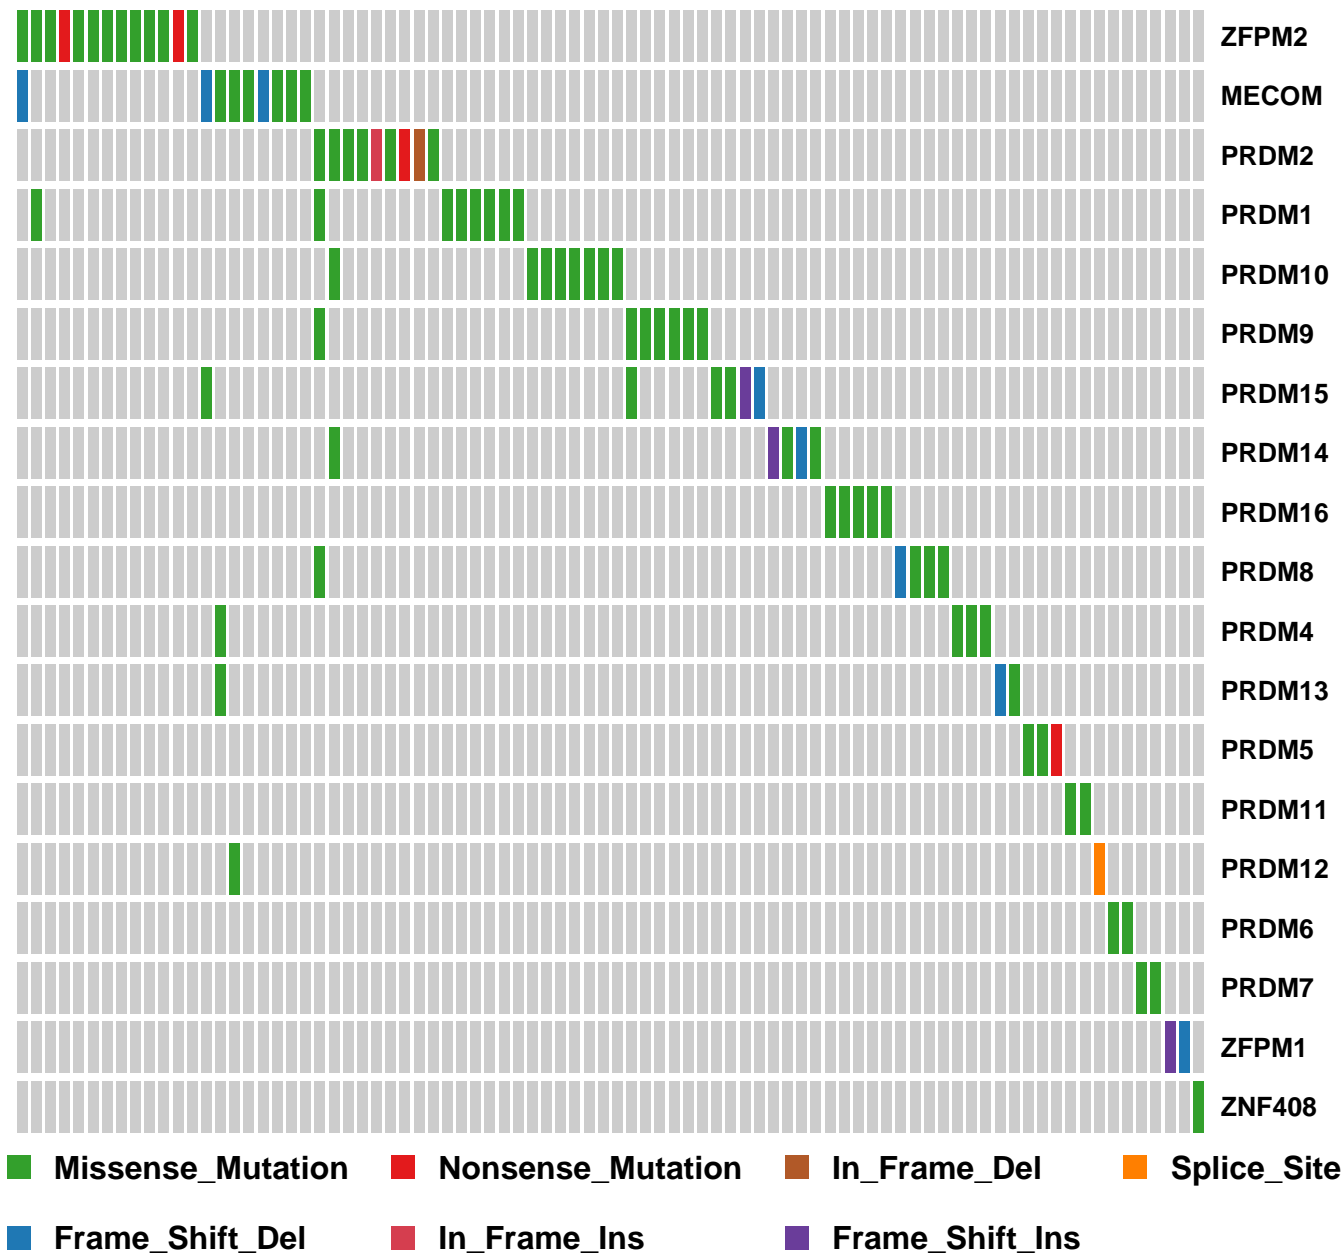

**Altered in 44 (22.11%) of 199 samples.**

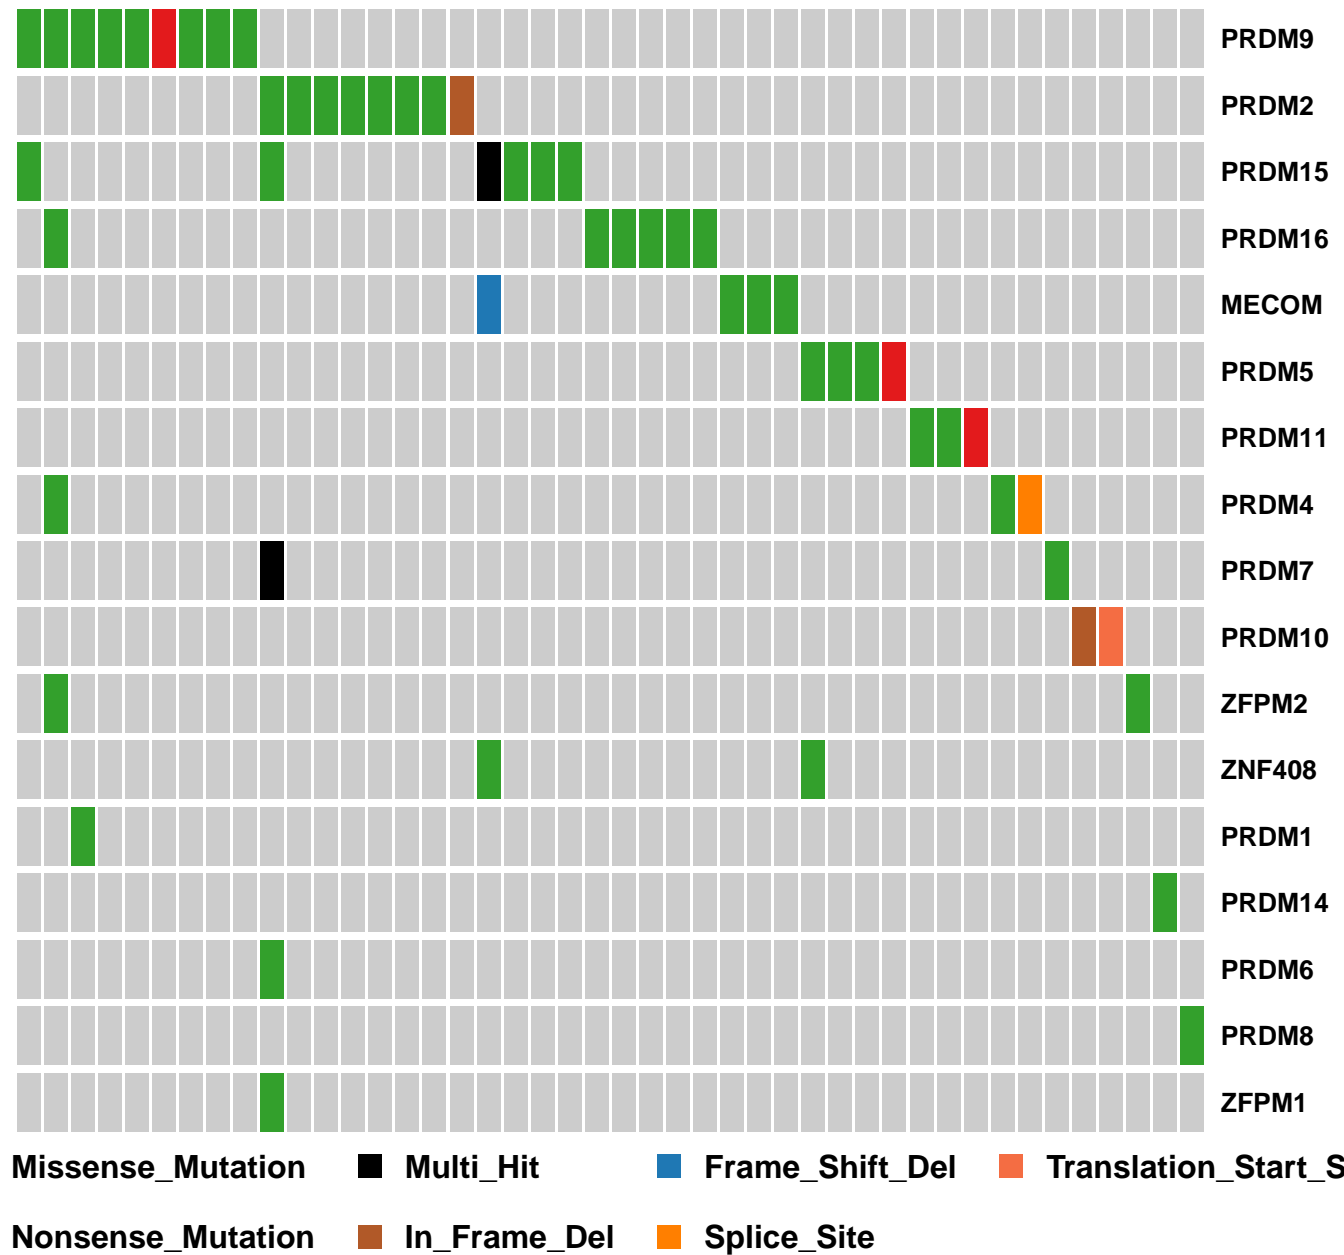

**Altered in 5 (13.89%) of 36 samples.**

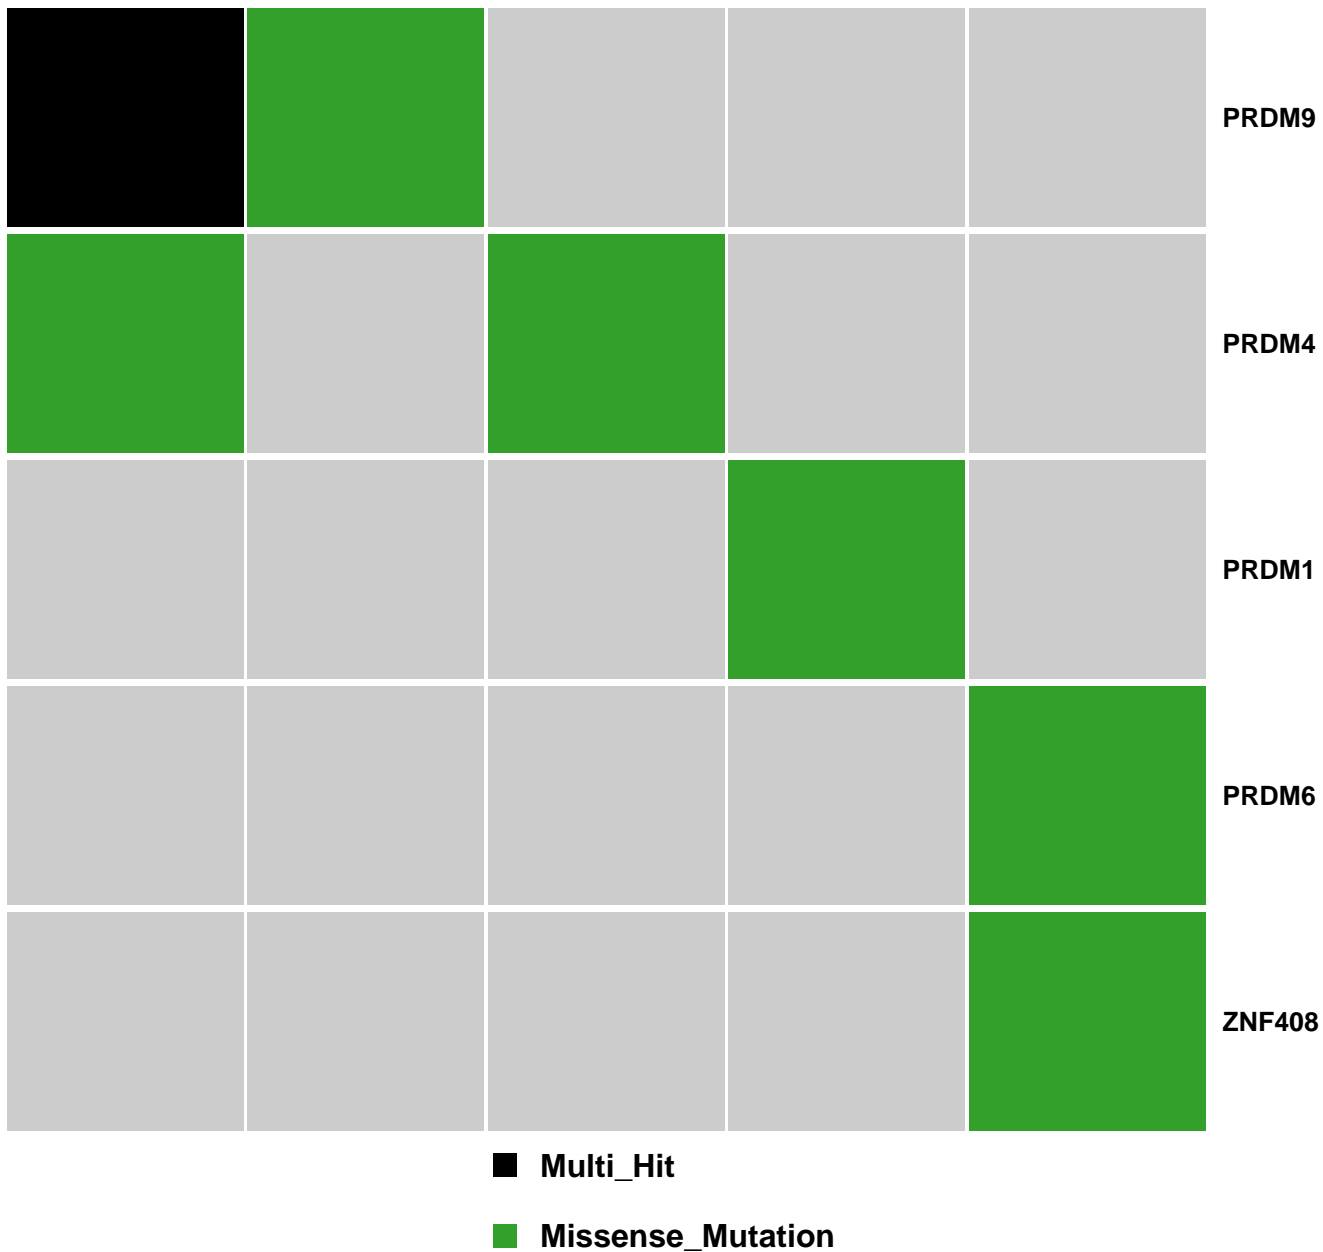

Altered in 78 (28.68%) of 272 samples.

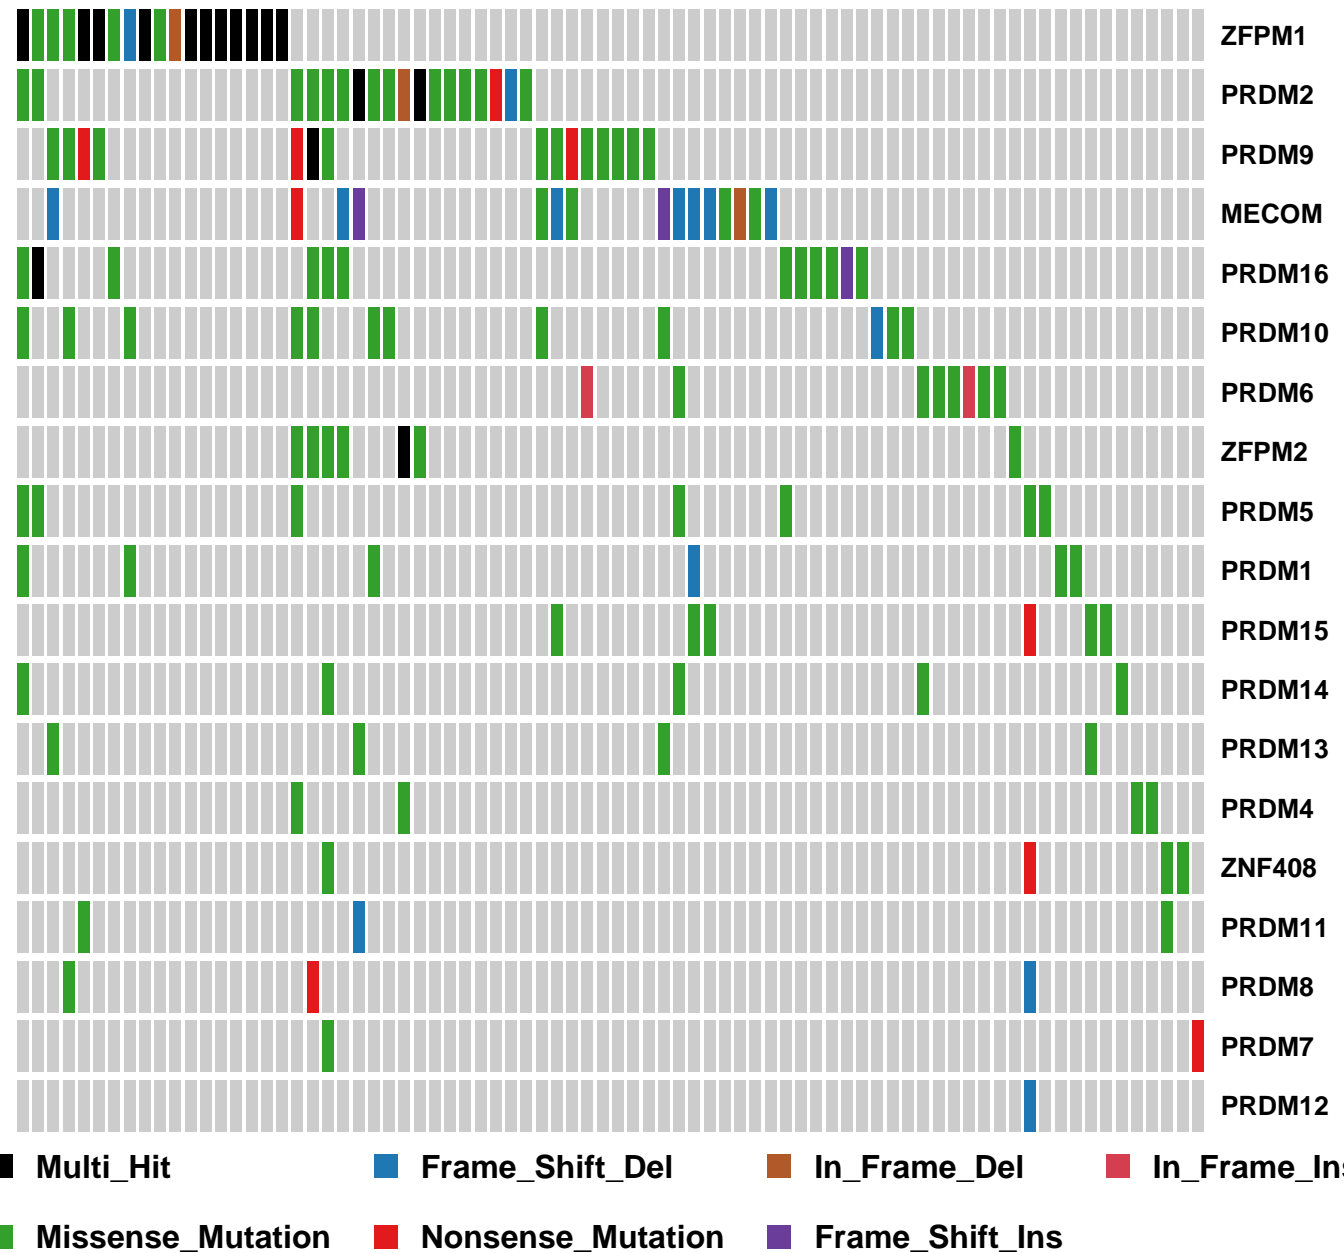

Altered in 14 (29.17%) of 48 samples.

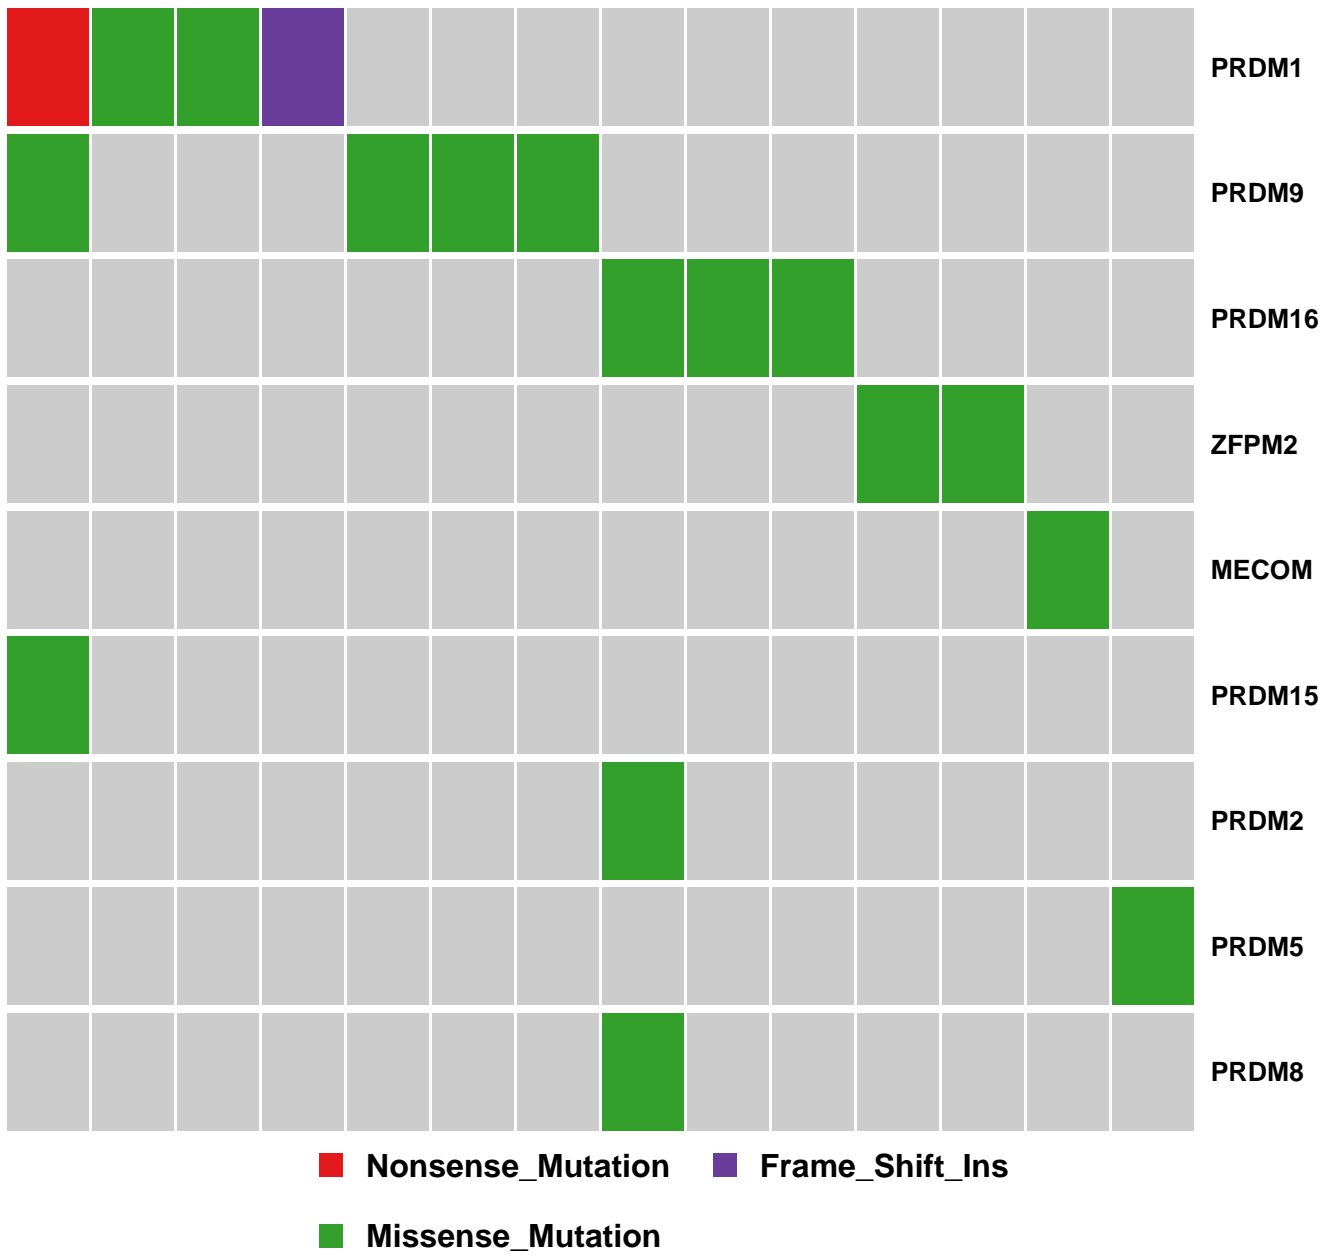



Altered in 70 (37.63%) of 186 samples.

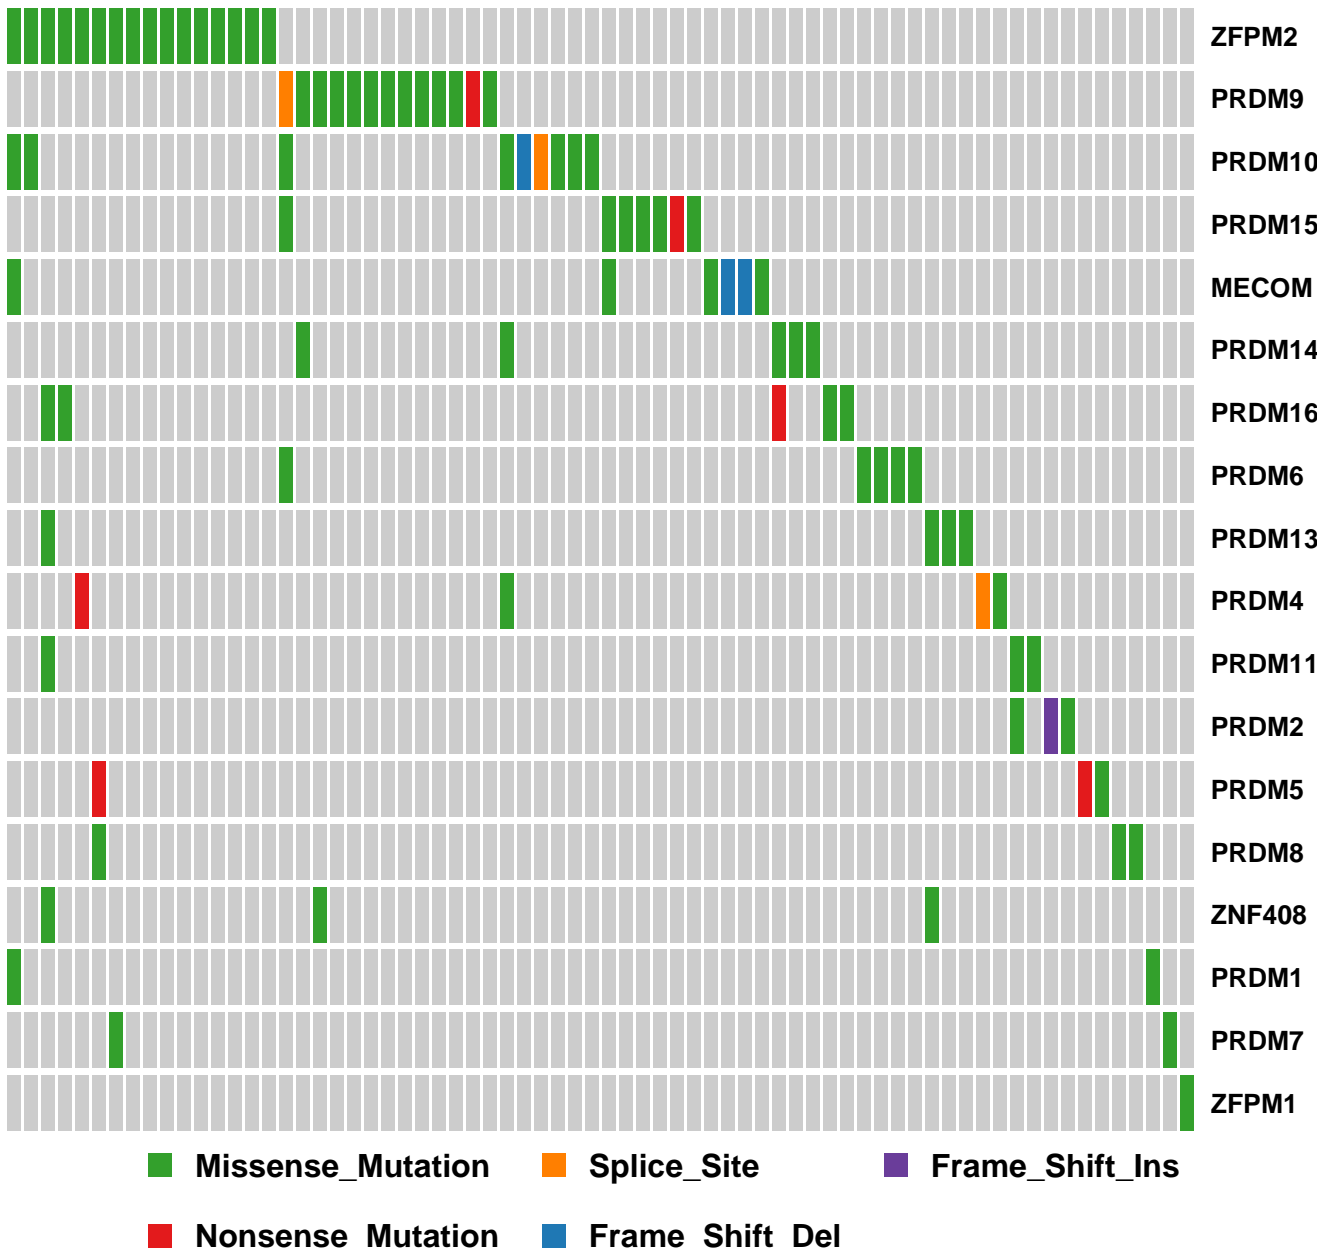

Altered in 121 (22.92%) of 528 samples.

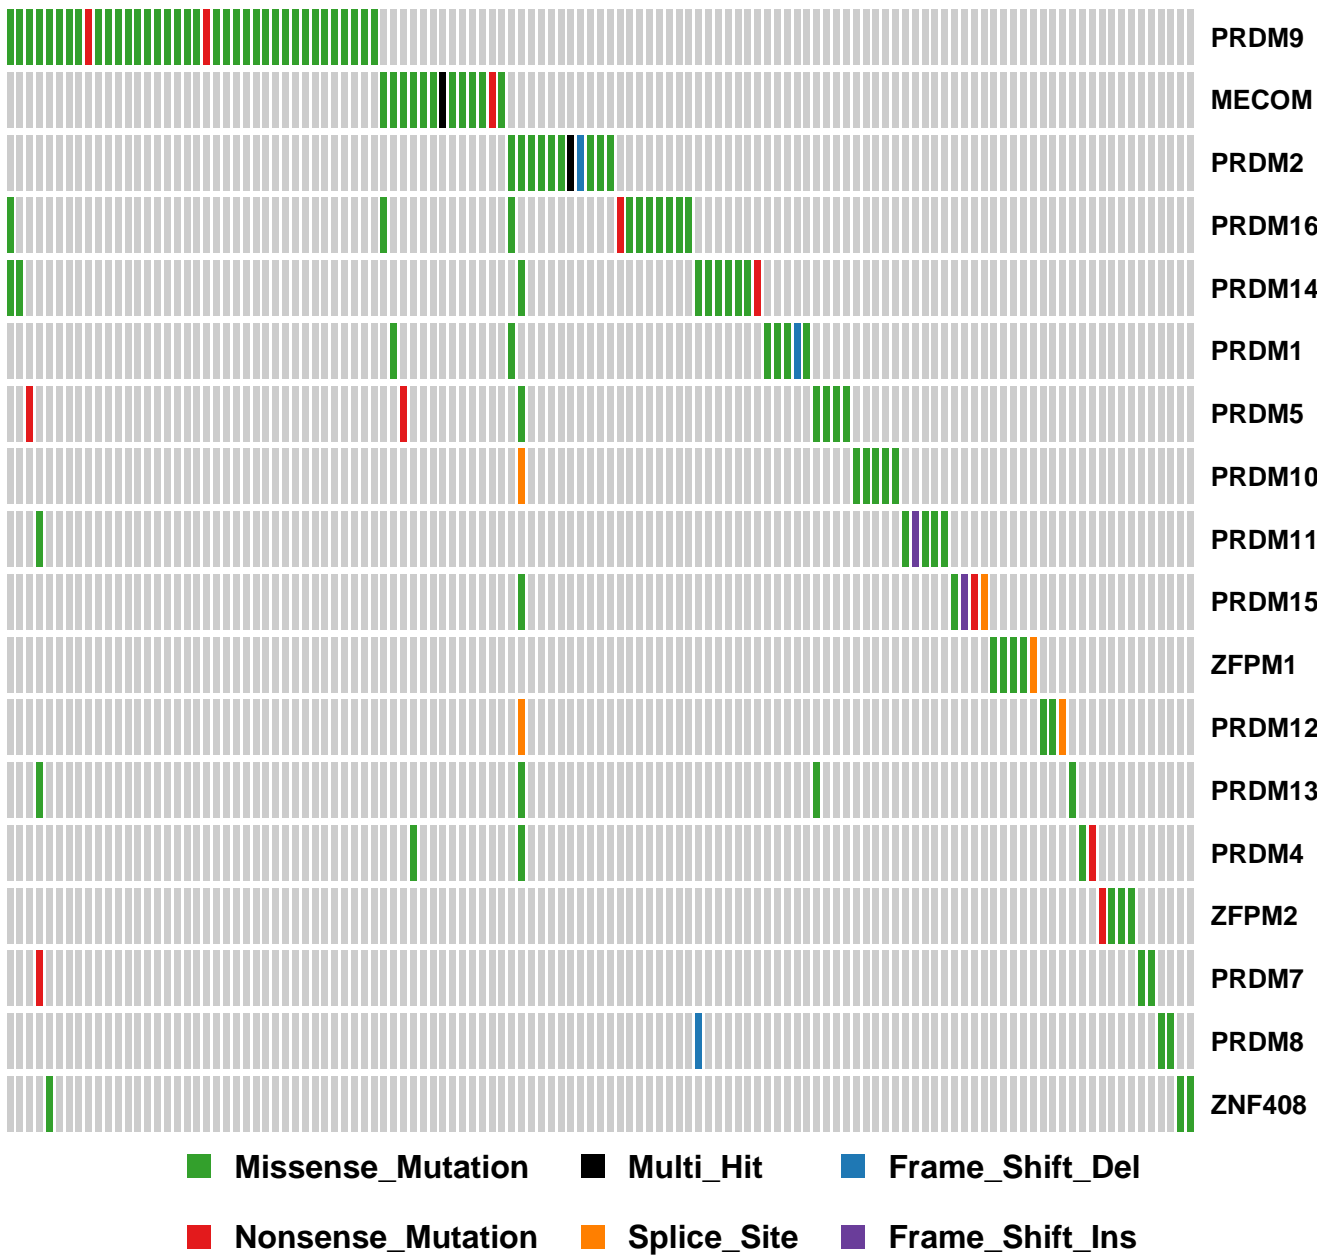

**Altered in 10 (15.15%) of 66 samples.**

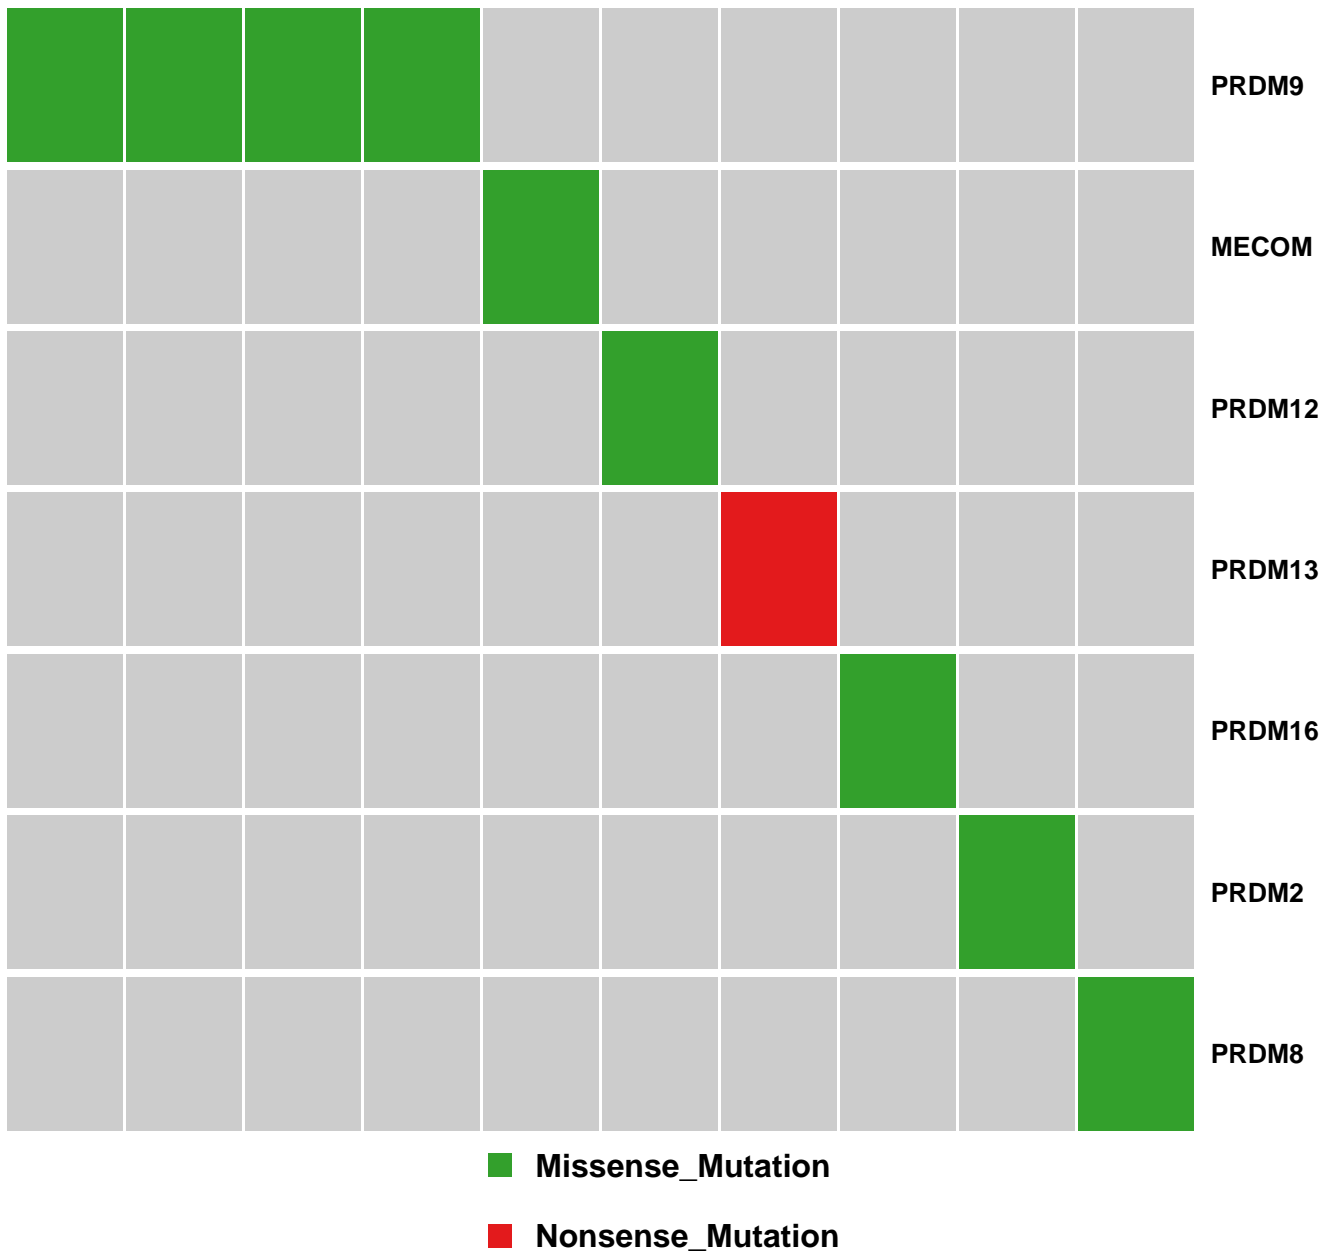

Altered in 65 (10.85%) of 599 samples.

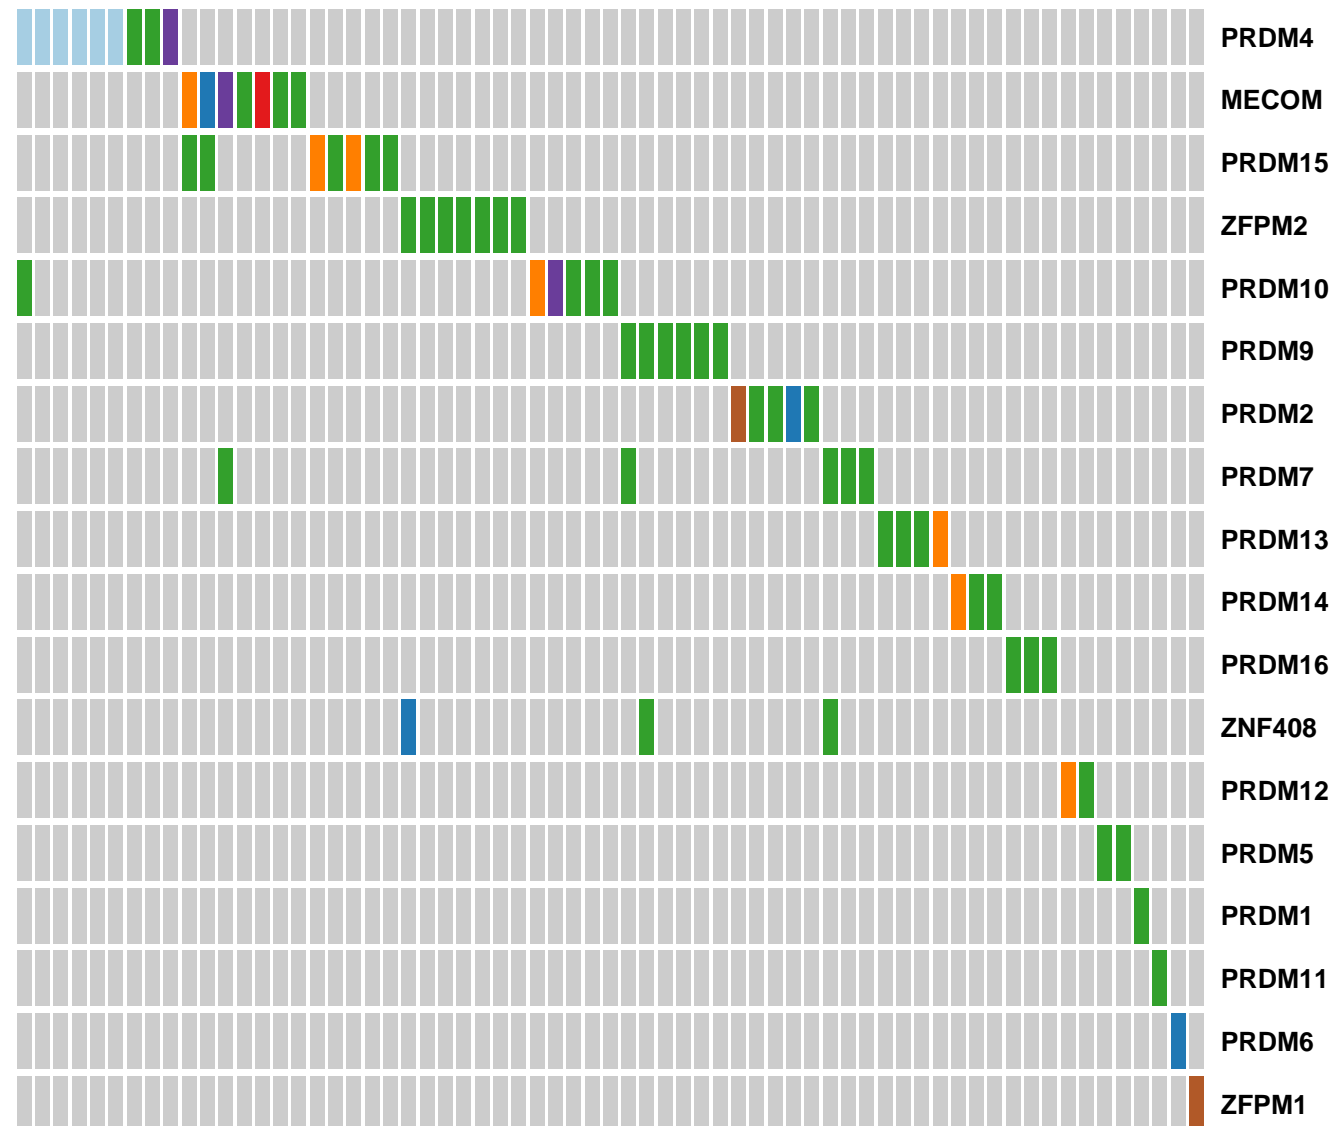

■ Nonstop\_Mutation
 ■ Frame\_Shift\_Ins
 ■ Frame\_Shift\_Del
 ■ In\_Frame\_Deletion
 ■ Missense\_Mutation
 ■ Splice\_Site
 ■ Nonsense\_Mutation

Altered in 35 (12.24%) of 286 samples.

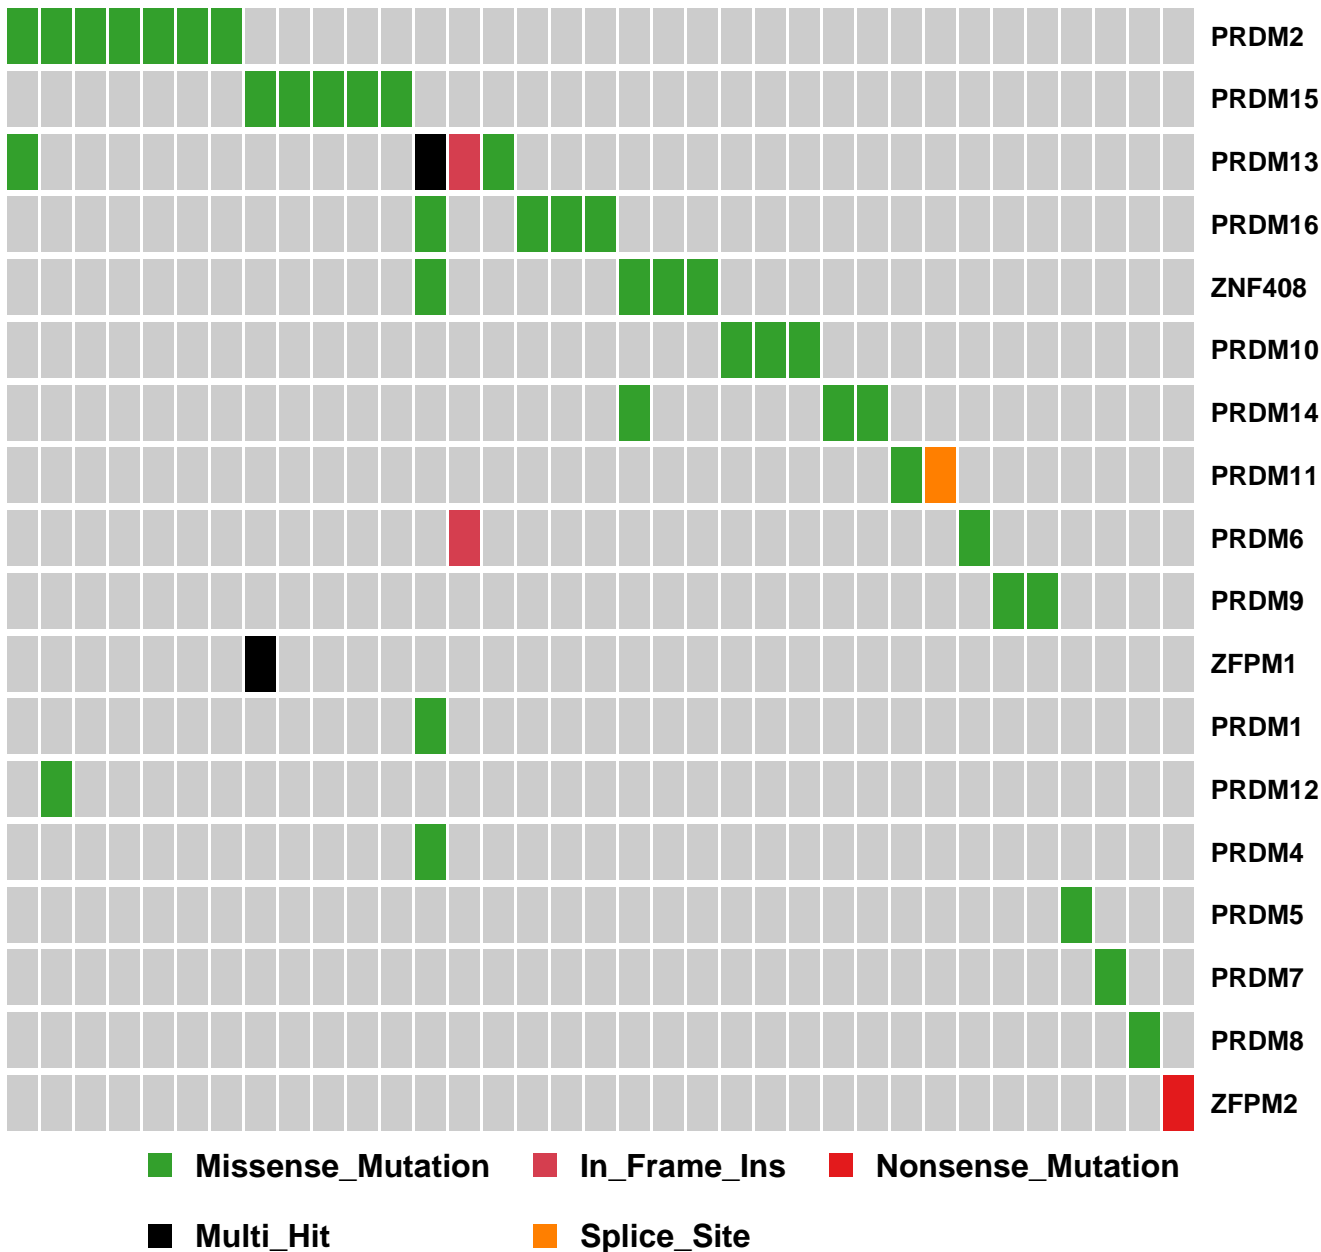

**Altered in 2 (1.02%) of 196 samples.**

**PRDM16**

**PRDM9**

■ **Missense\_Mutation**

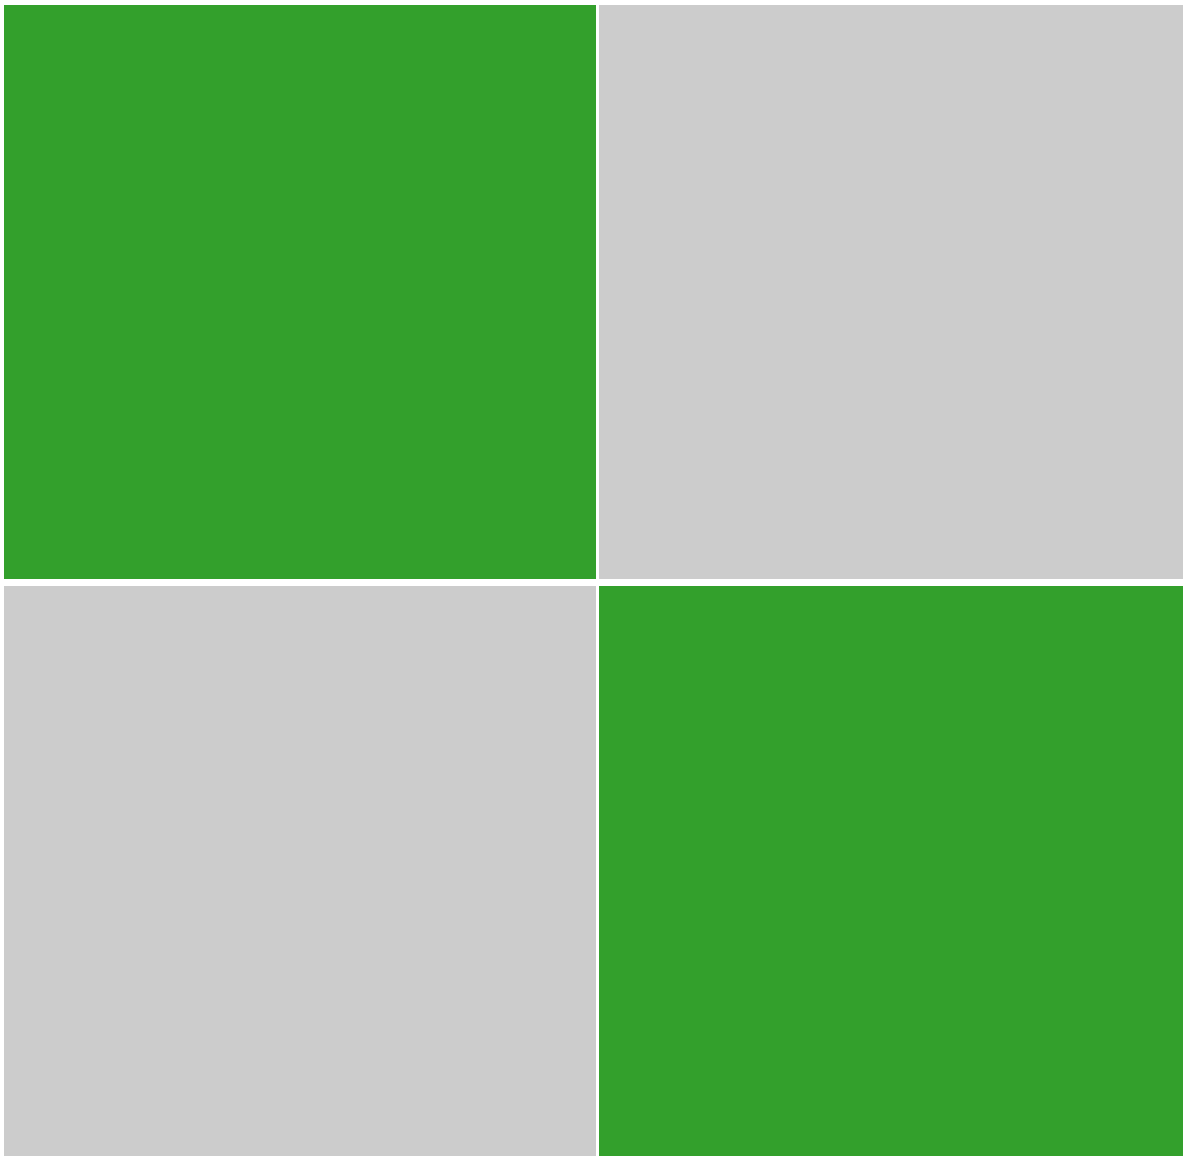

Altered in 87 (22.96%) of 379 samples.

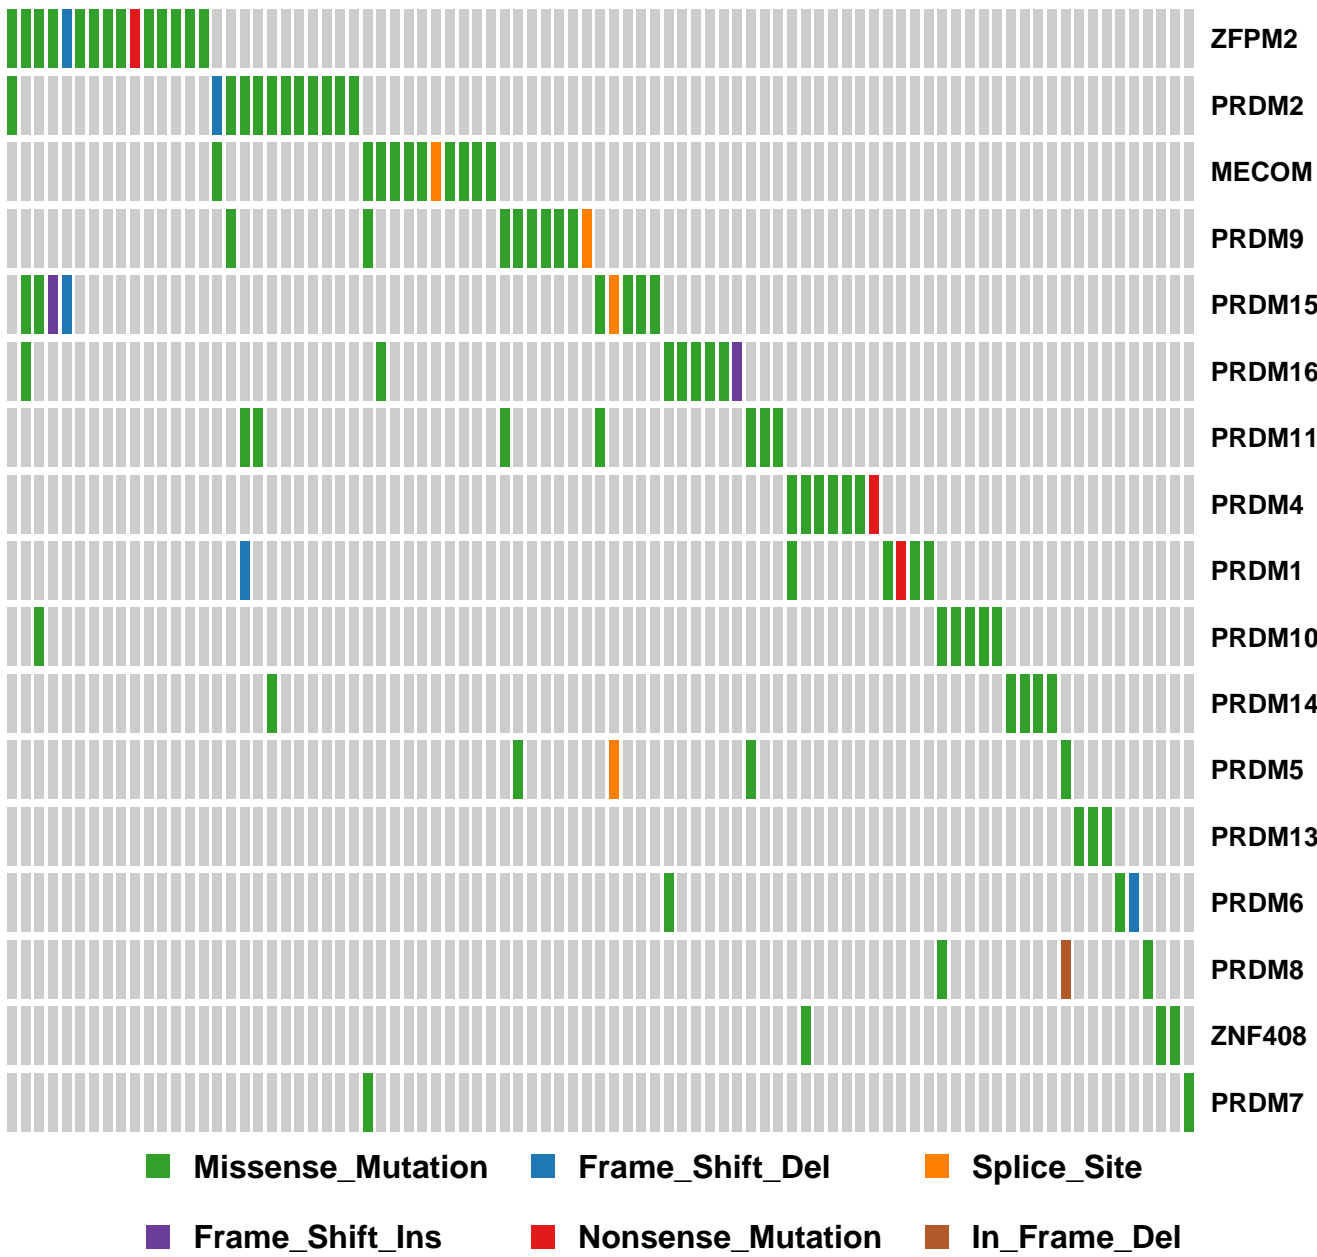

Altered in 230 (40.49%) of 568 samples.

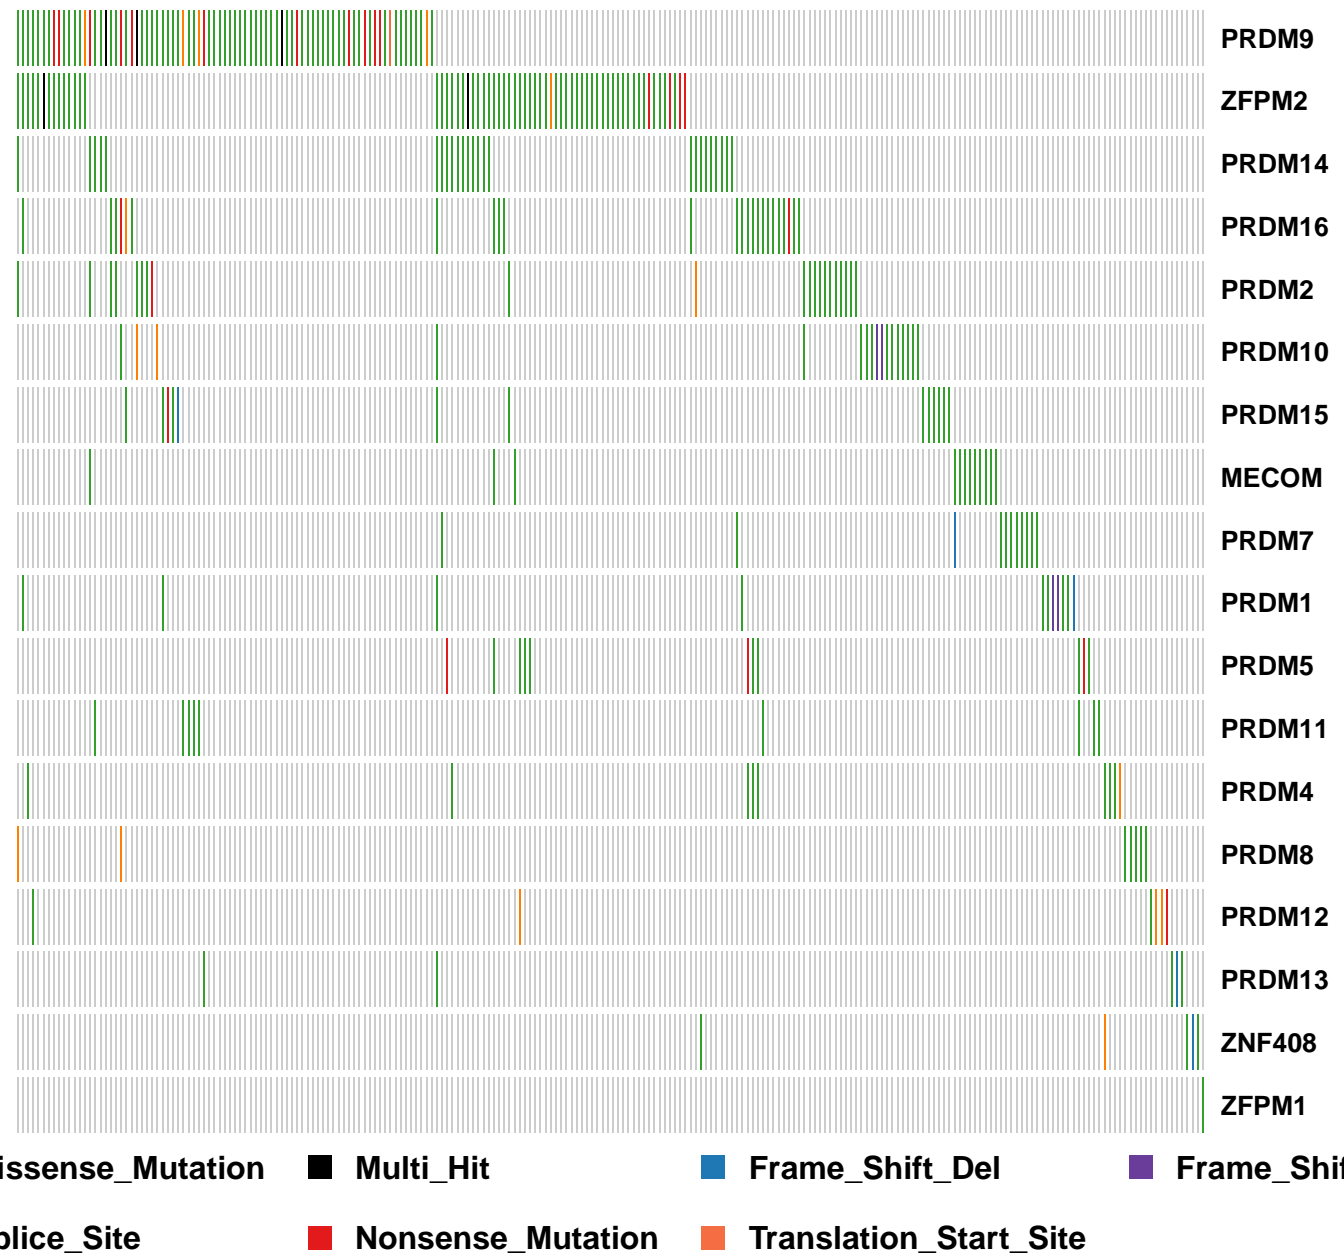



**Altered in 57 (32.02%) of 178 samples.**

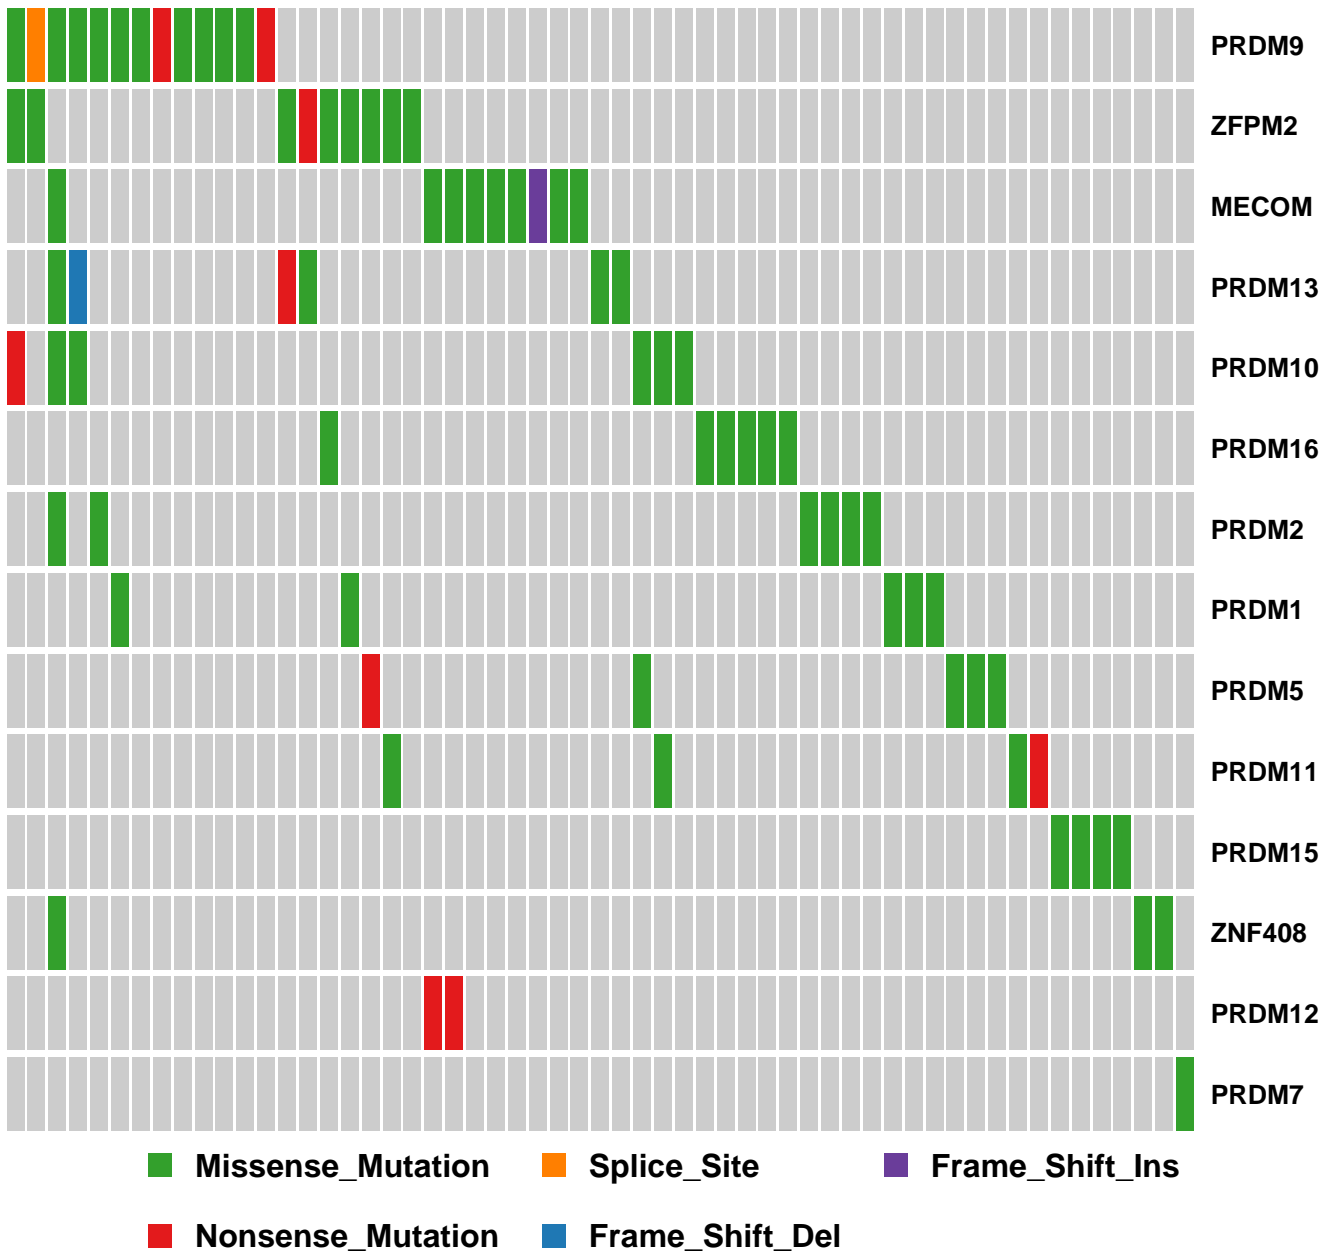

Altered in 17 (3.68%) of 462 samples.

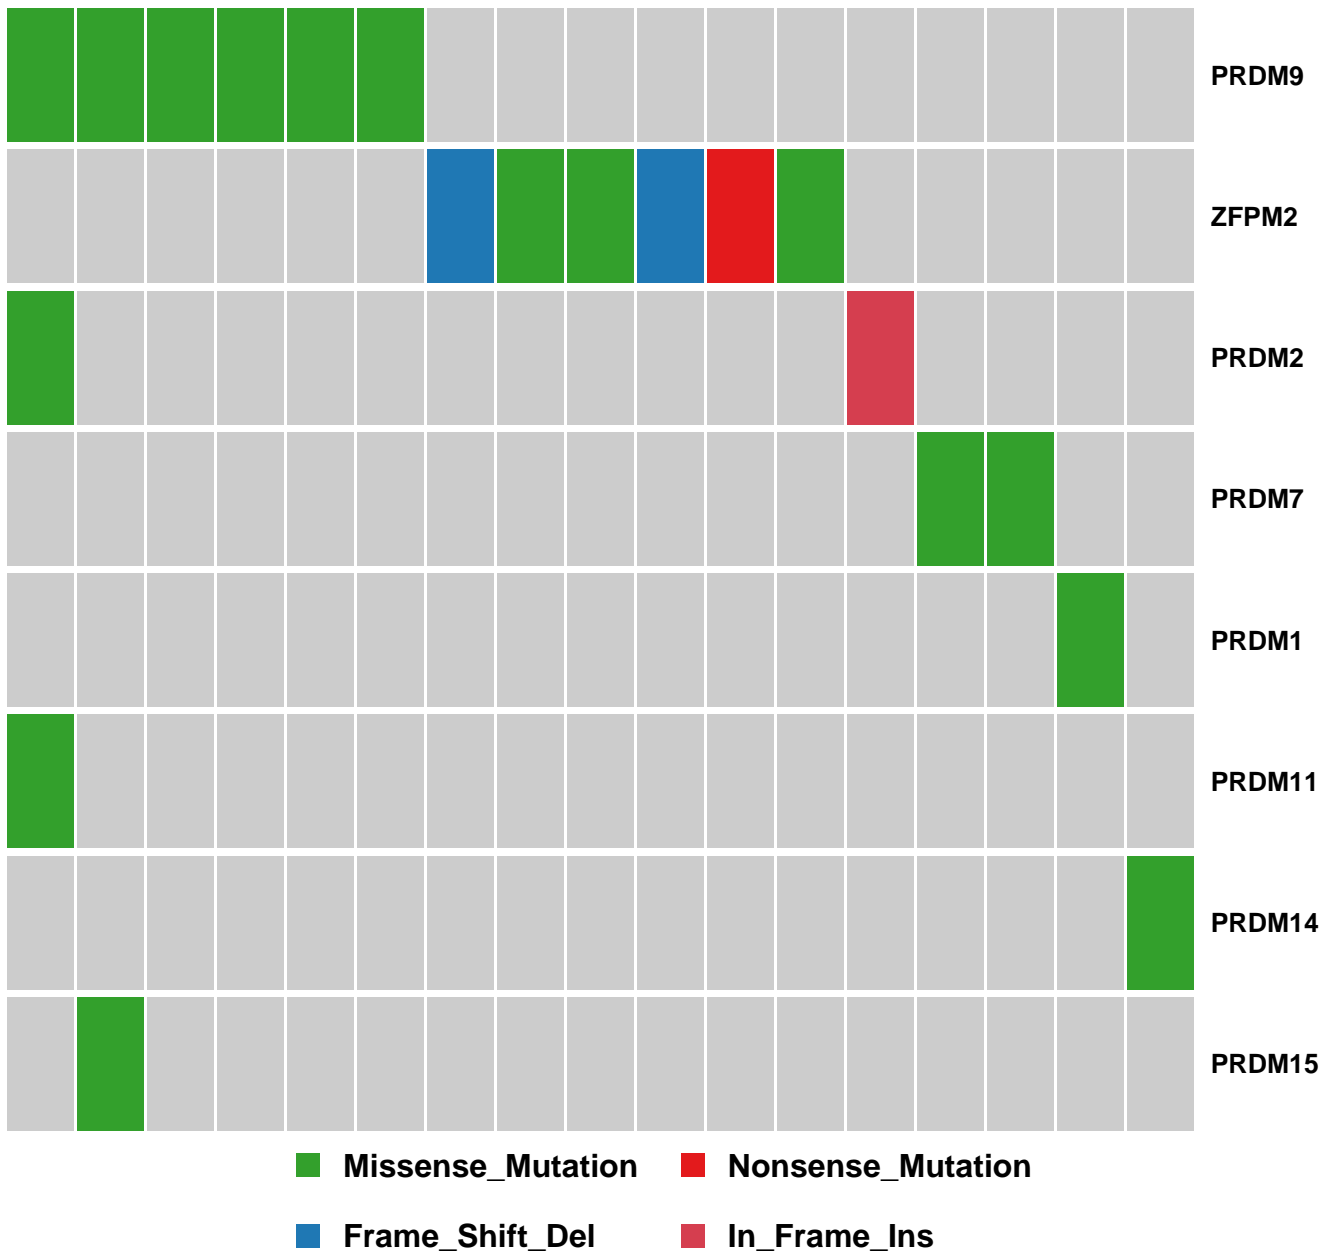

Altered in 72 (38.71%) of 186 samples.

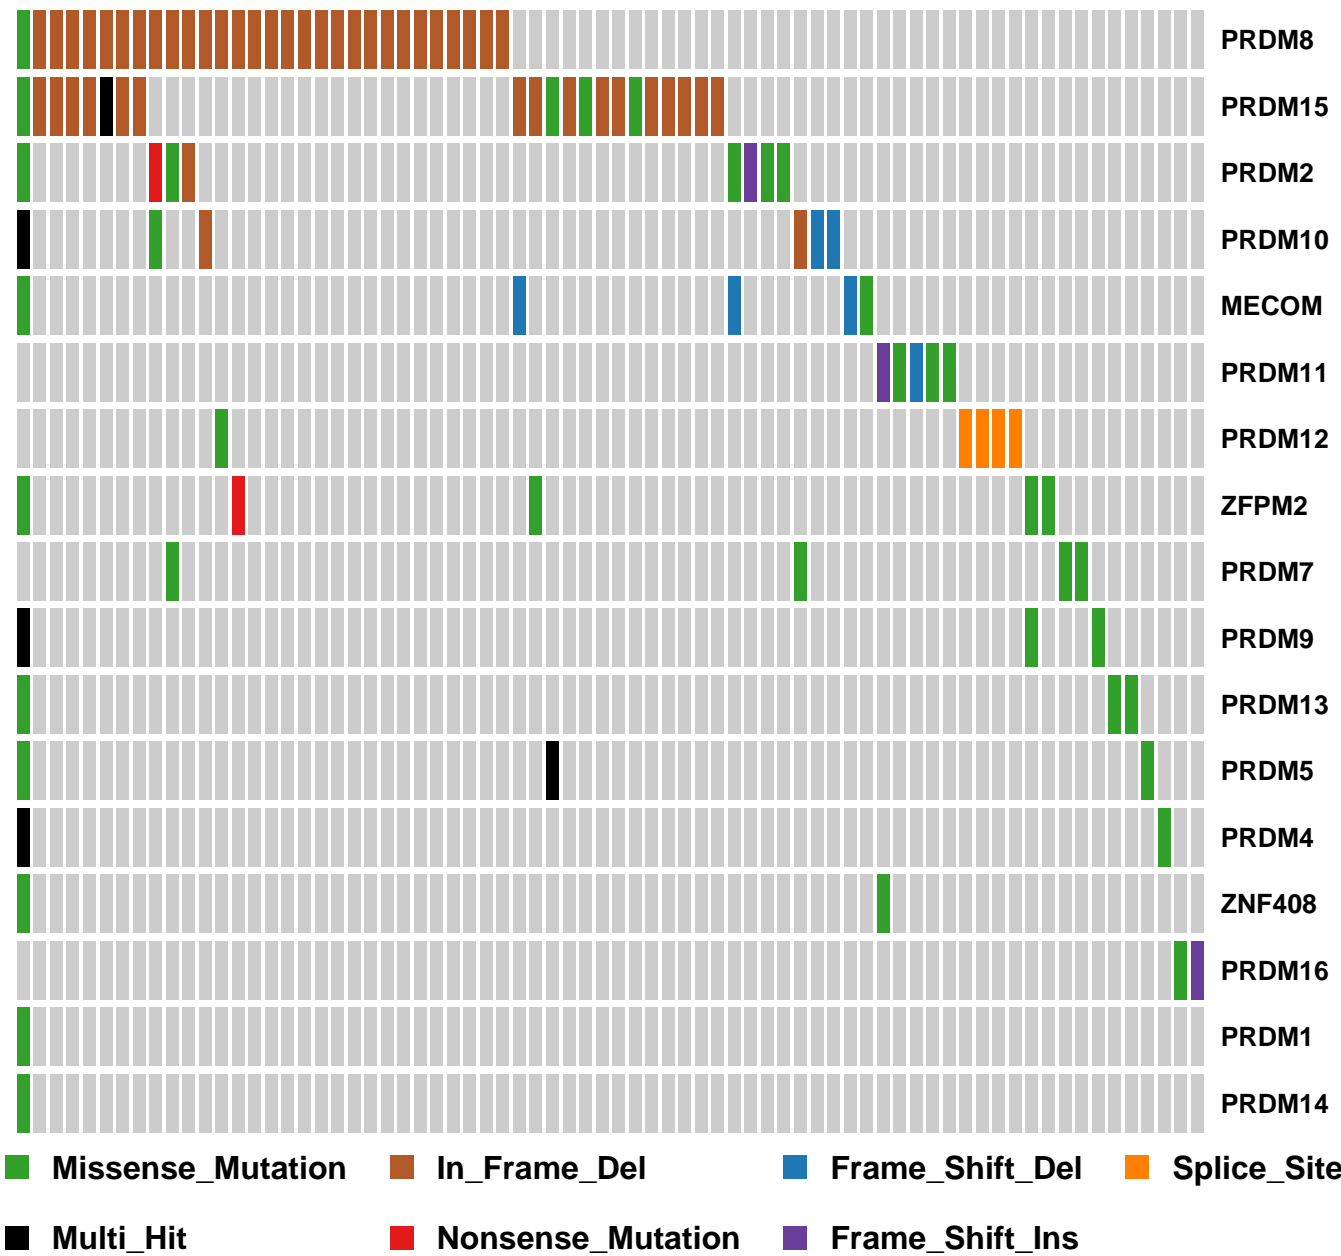

**Altered in 5 (2.72%) of 184 samples.**

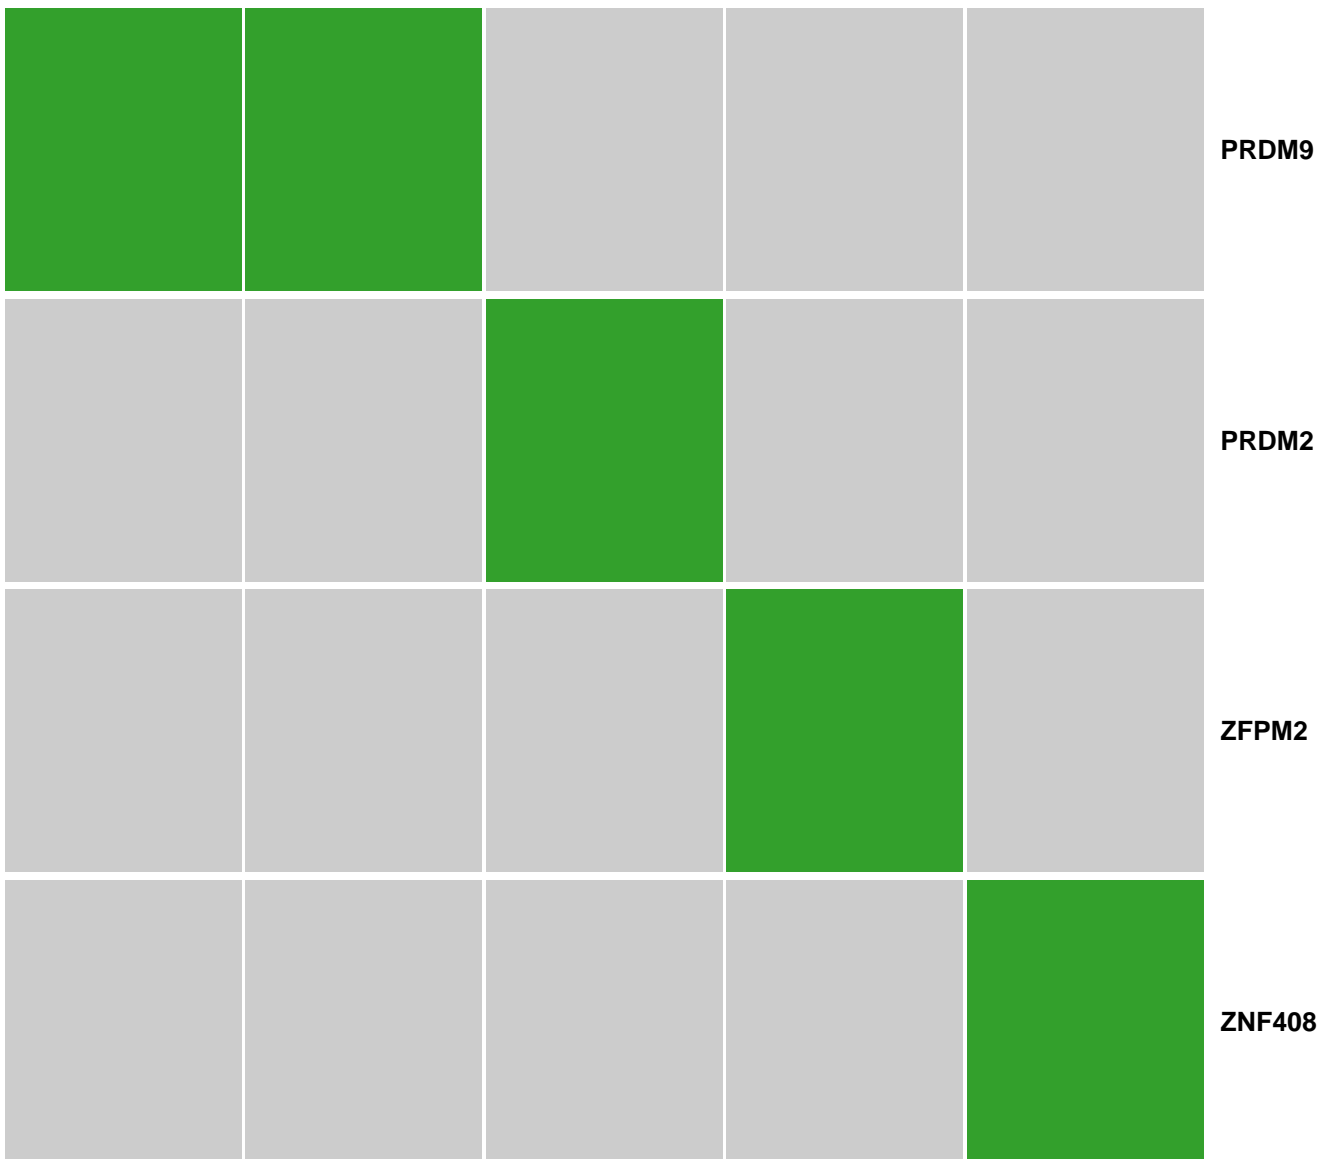

 **Missense\_Mutation**

Altered in 43 (8.55%) of 503 samples.

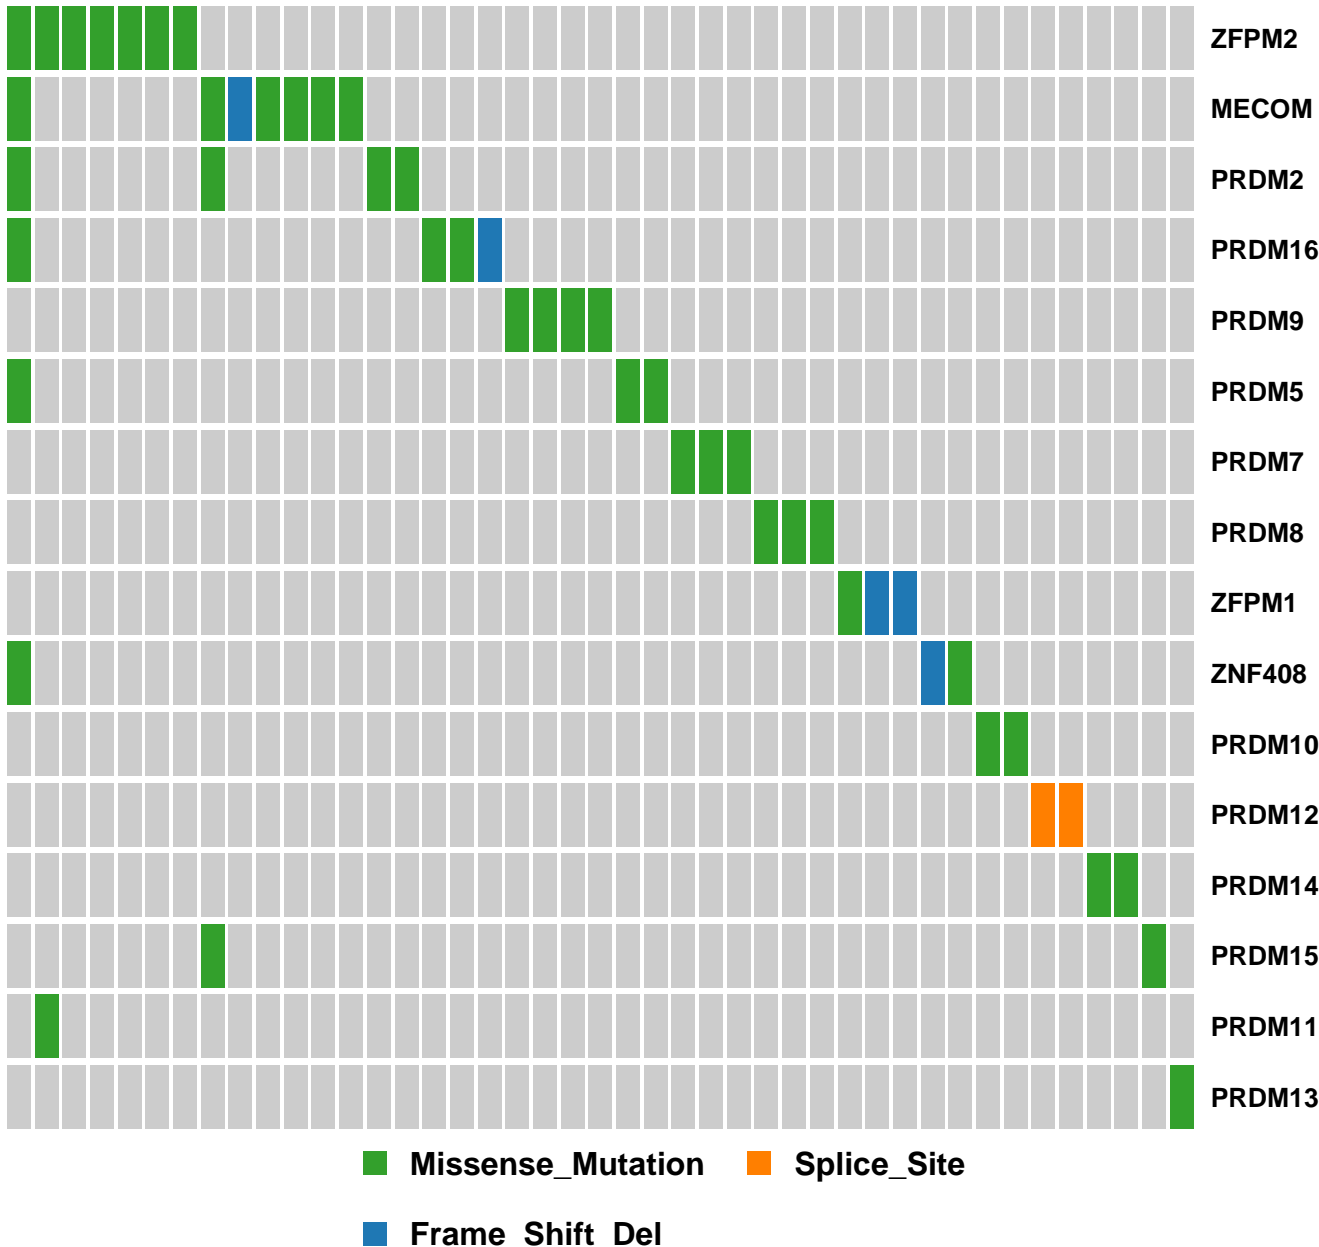

Altered in 24 (20.69%) of 116 samples.

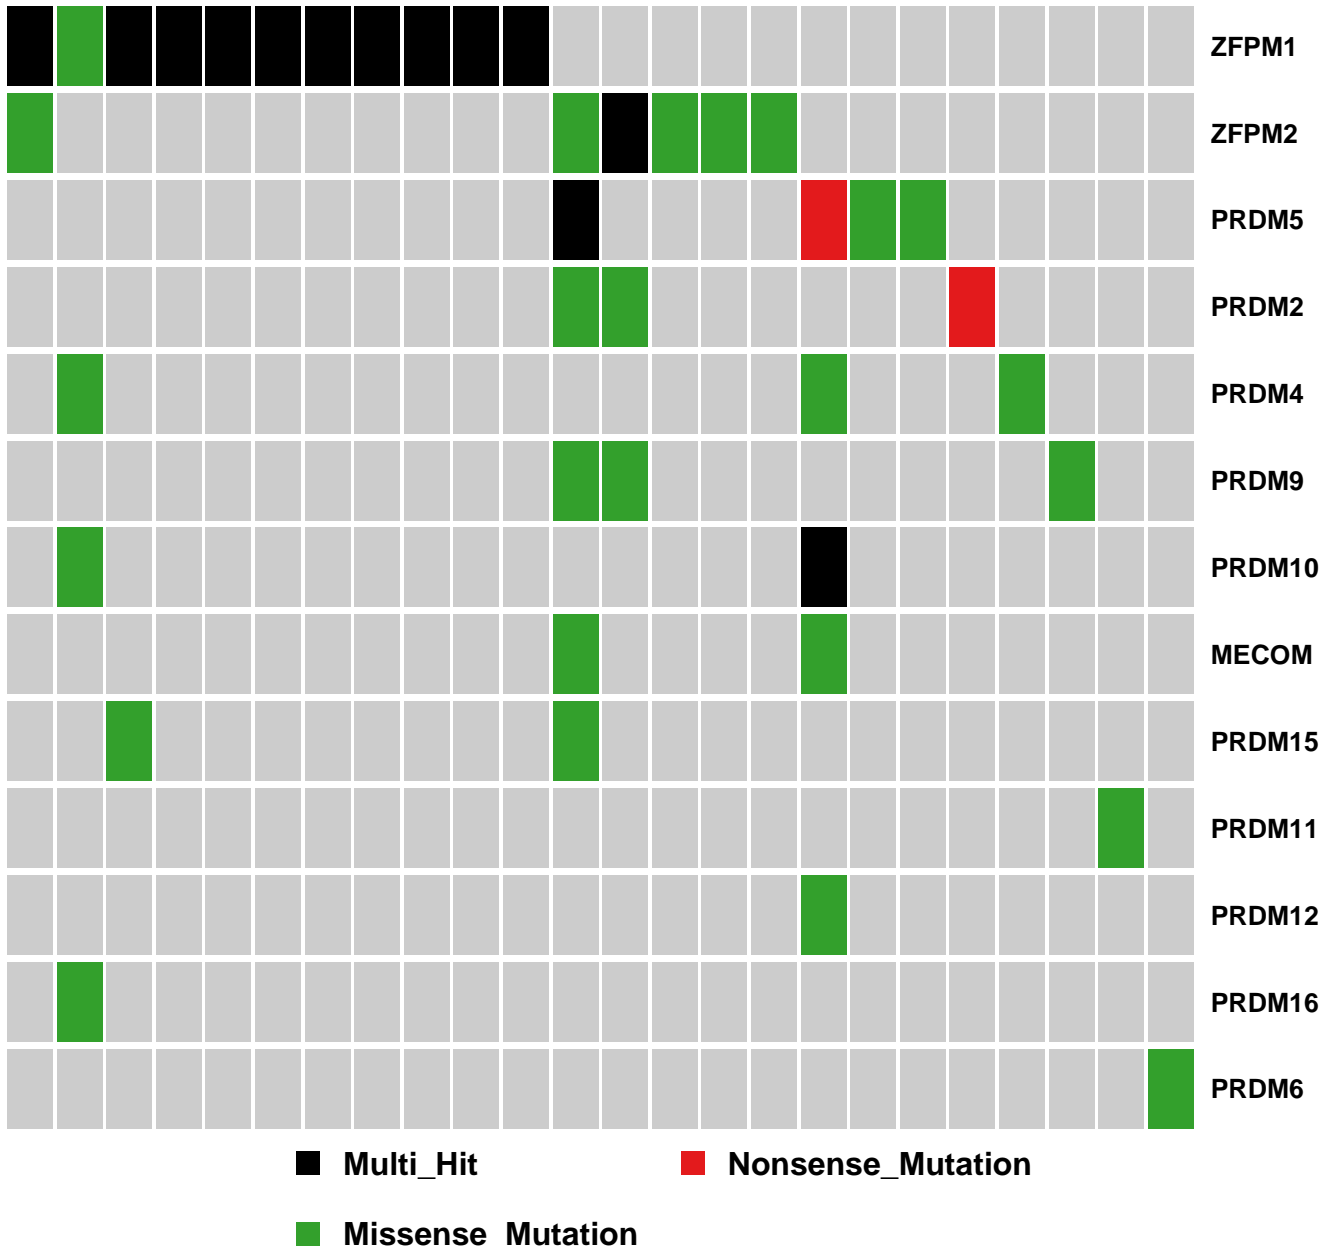

Altered in 43 (16.41%) of 262 samples.

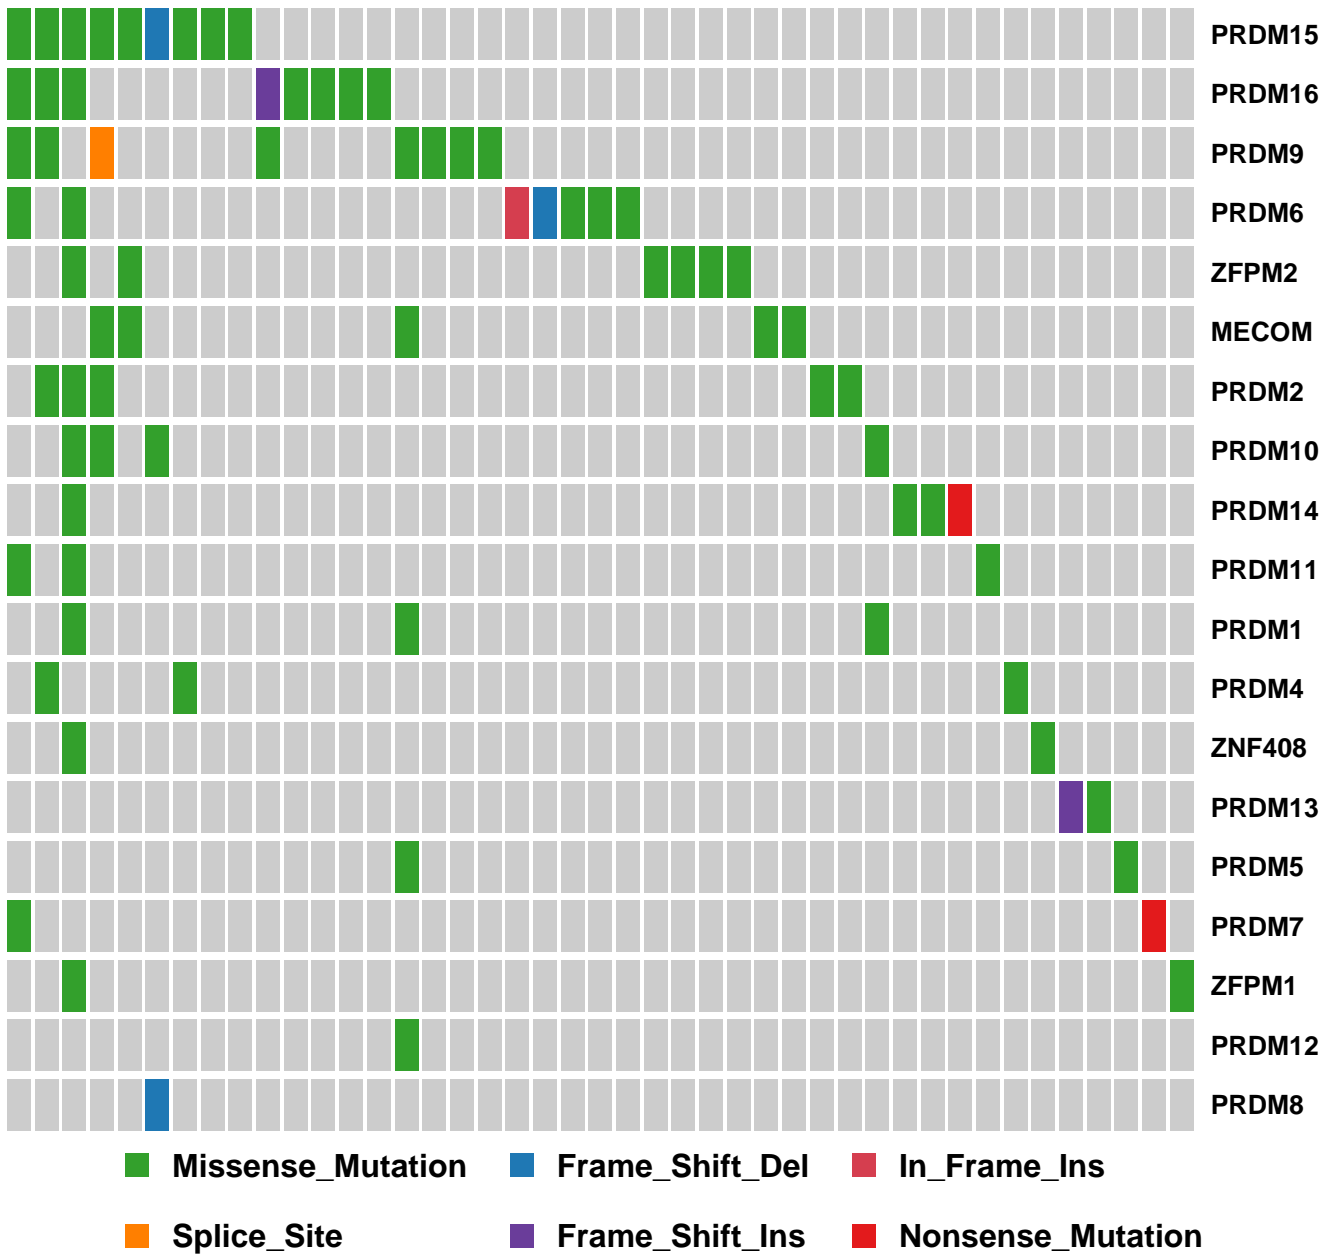

Altered in 237 (50.21%) of 472 samples.

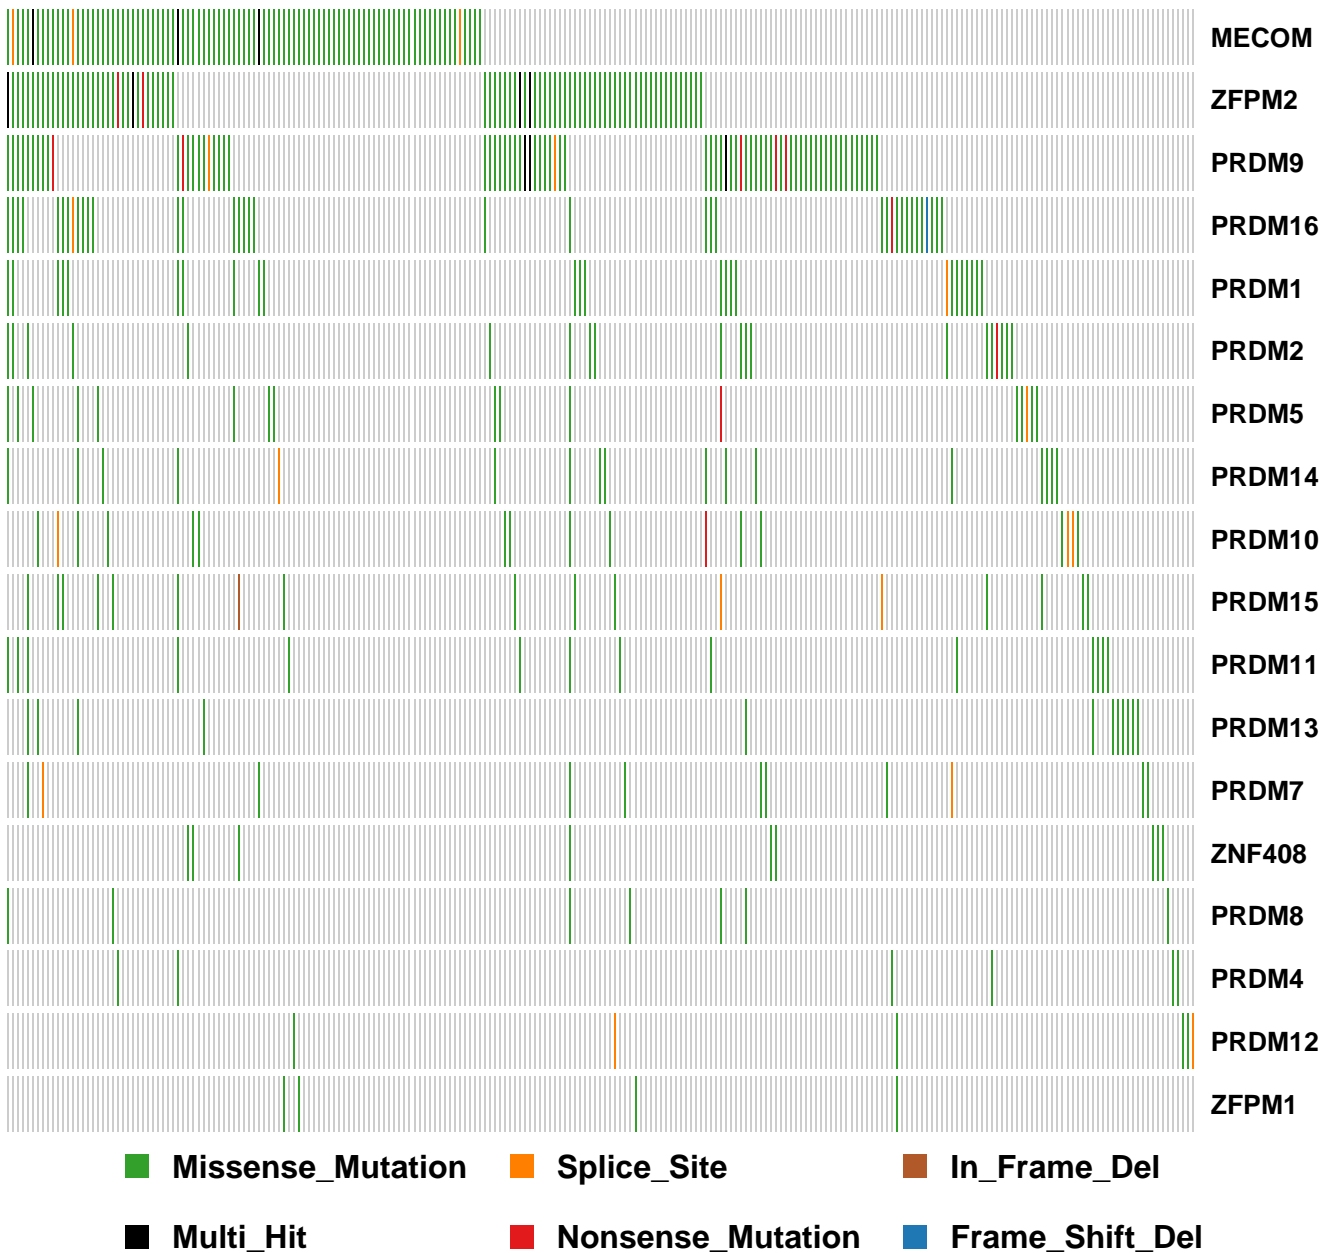



Altered in 125 (31.65%) of 395 samples.

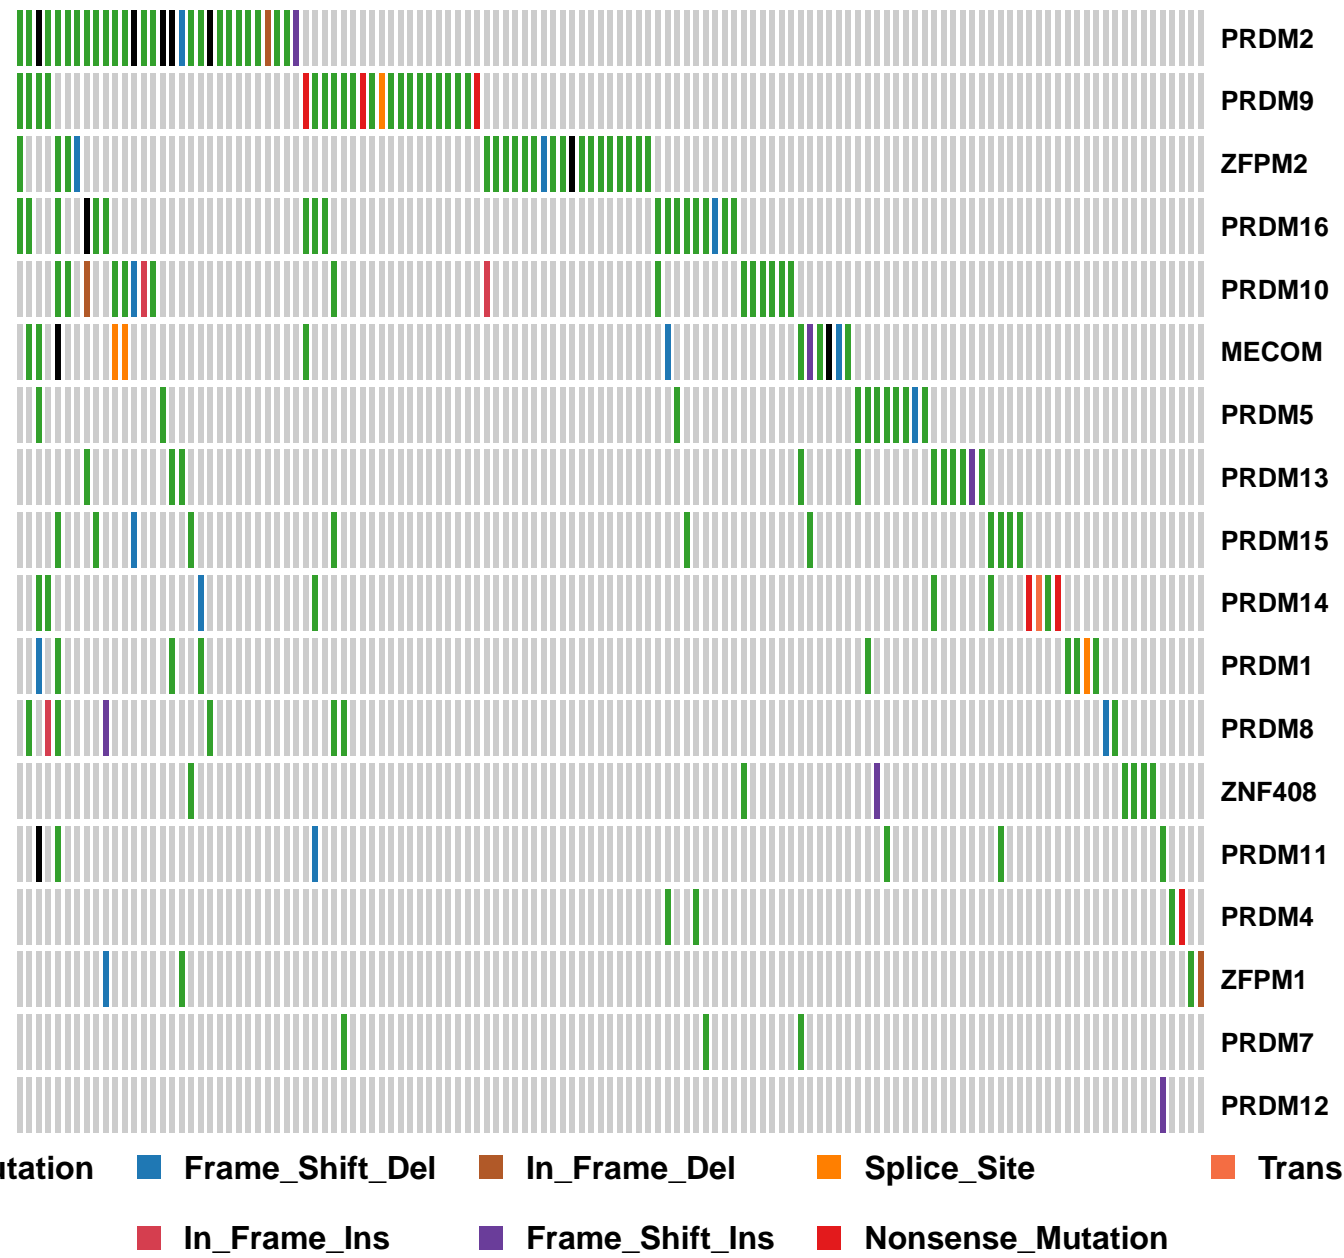

Altered in 21 (13.46%) of 156 samples.

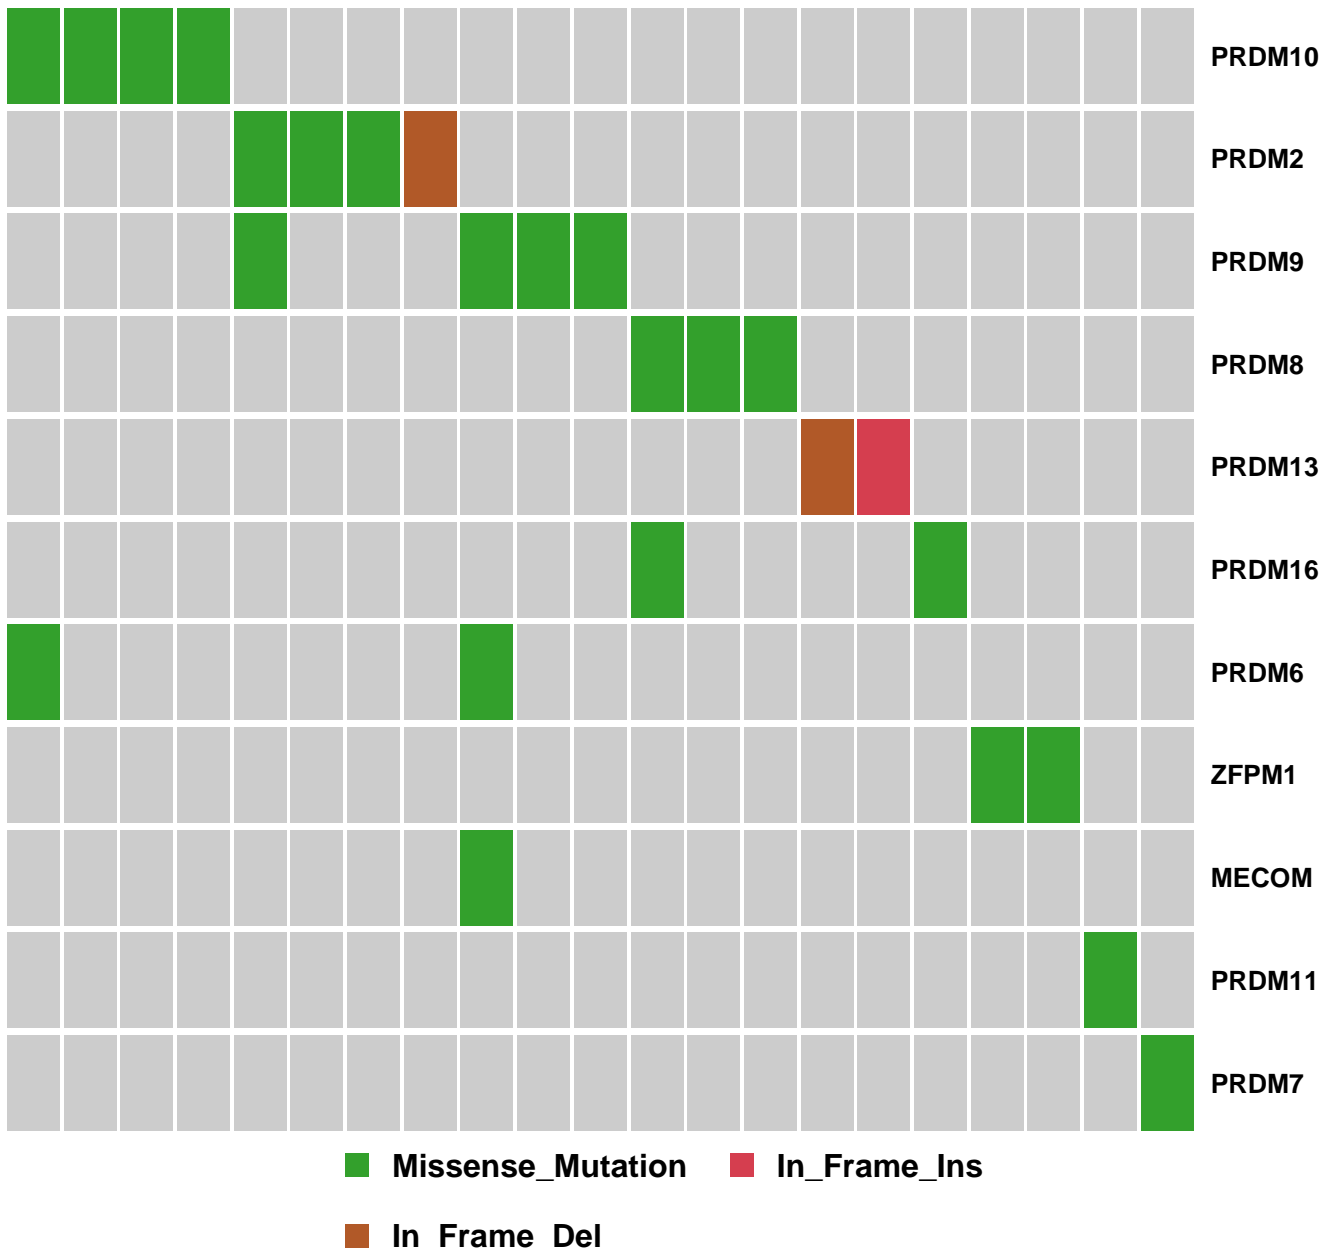

Altered in 34 (6.75%) of 504 samples.

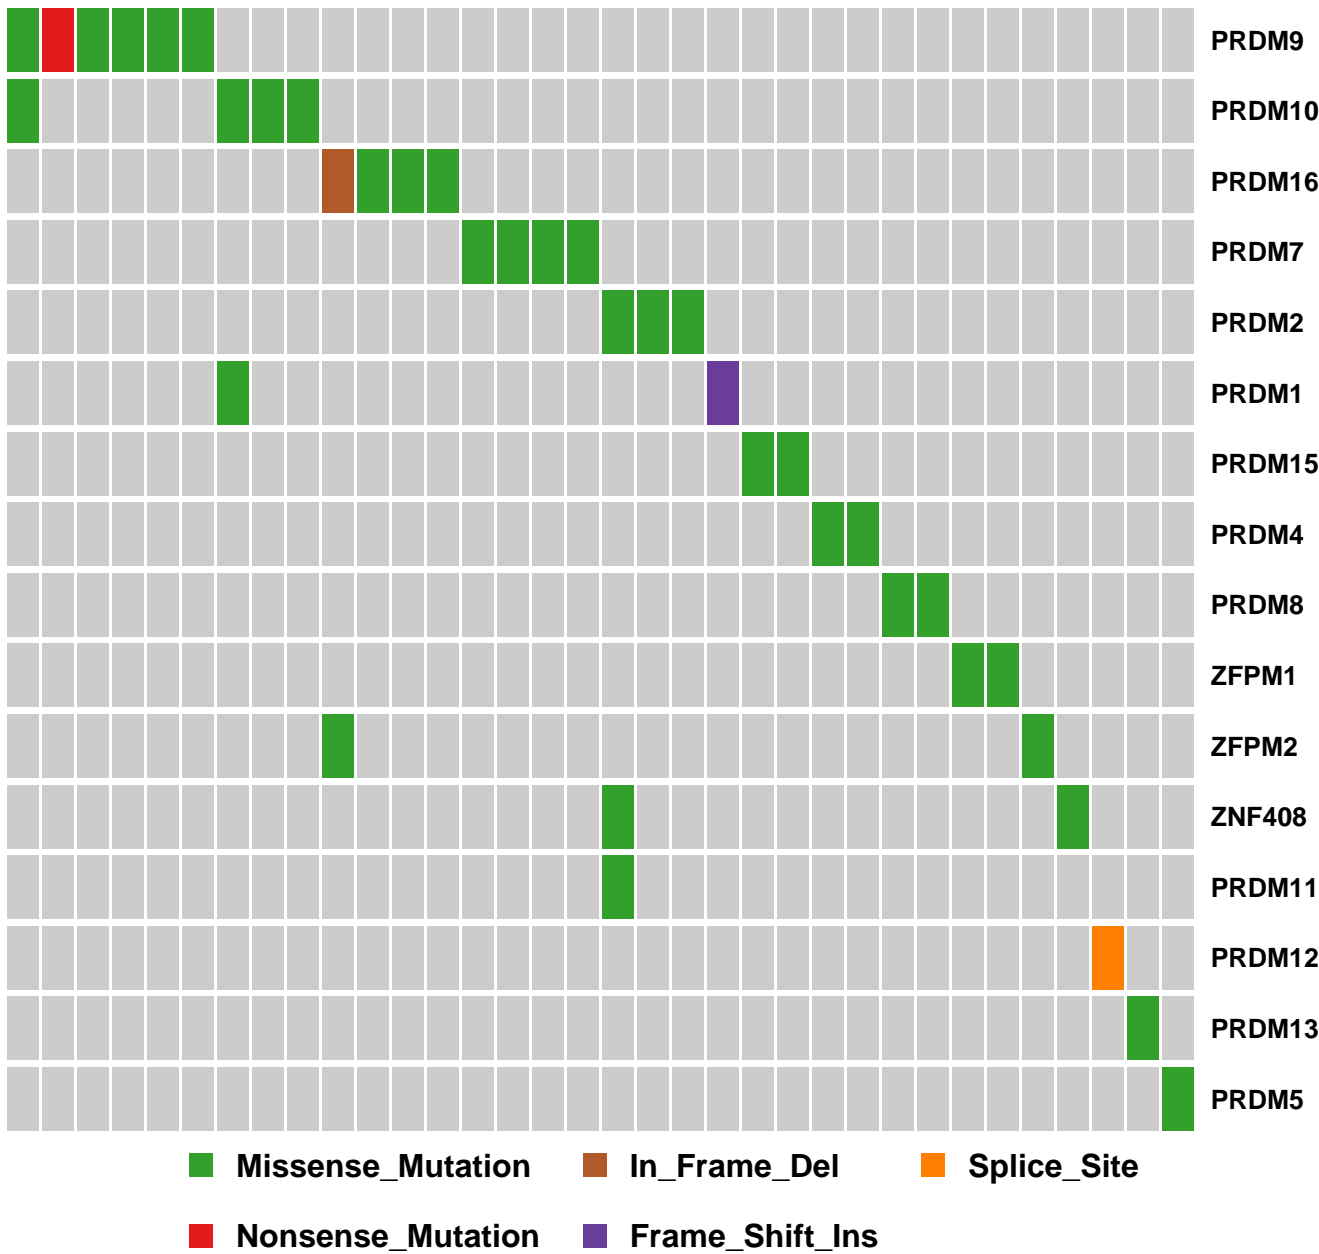

**Altered in 40 (32.52%) of 123 samples.**

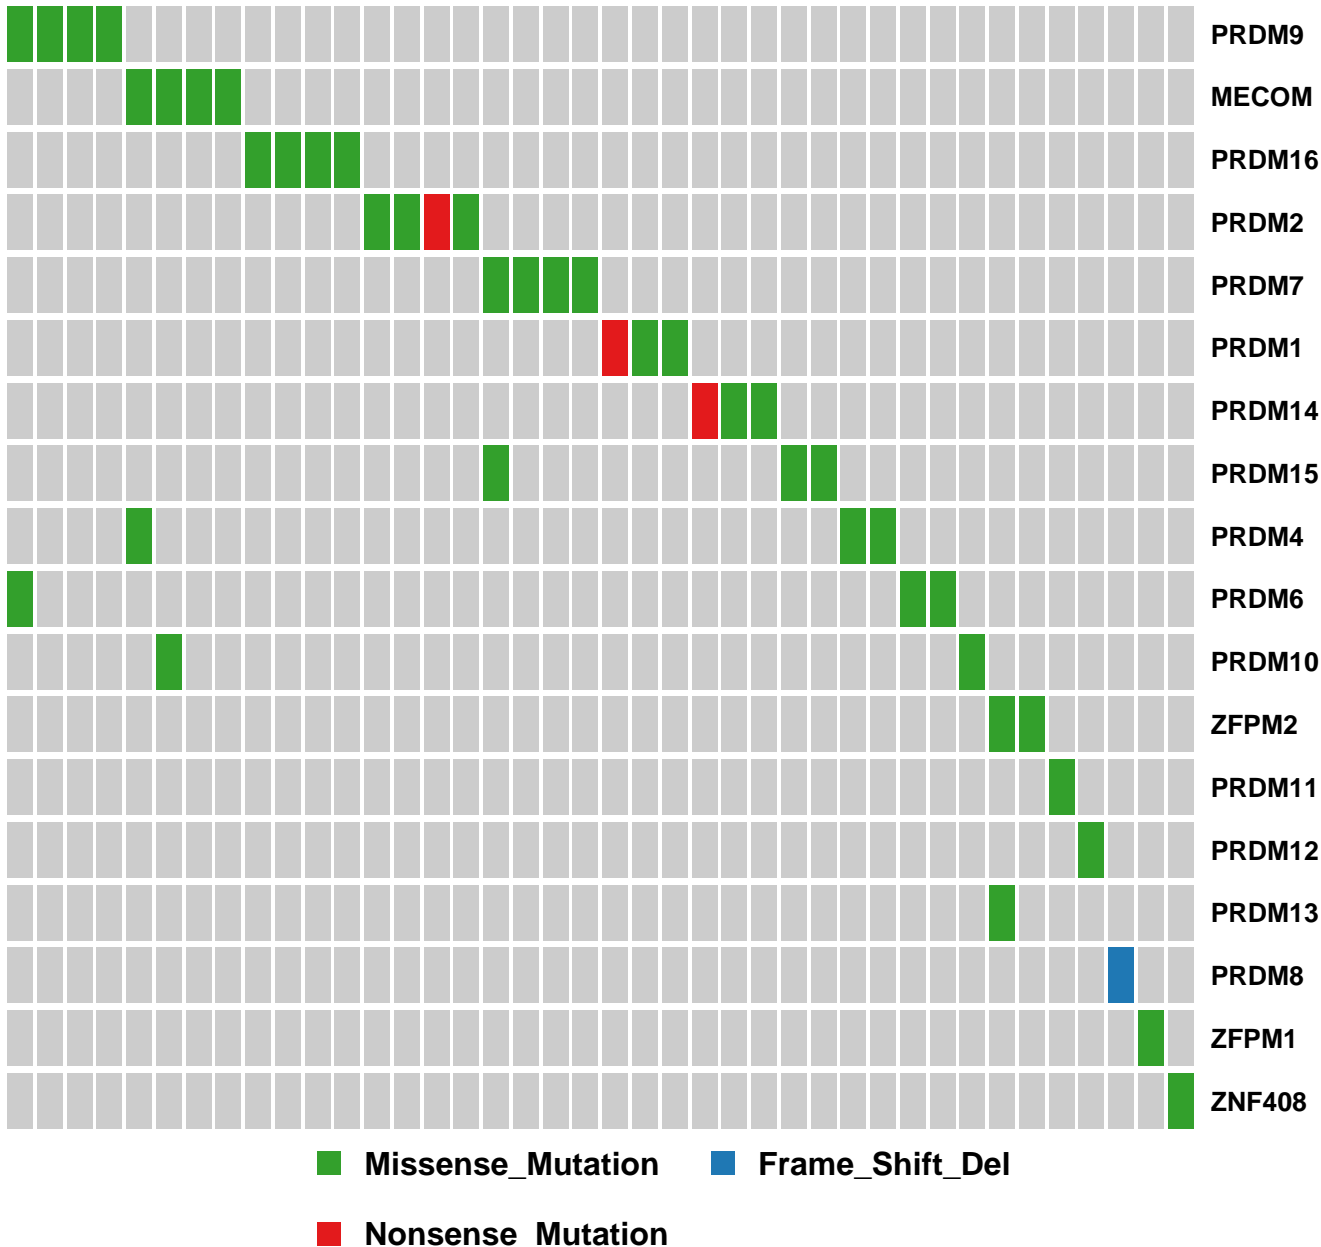

Altered in 83 (33.47%) of 248 samples.

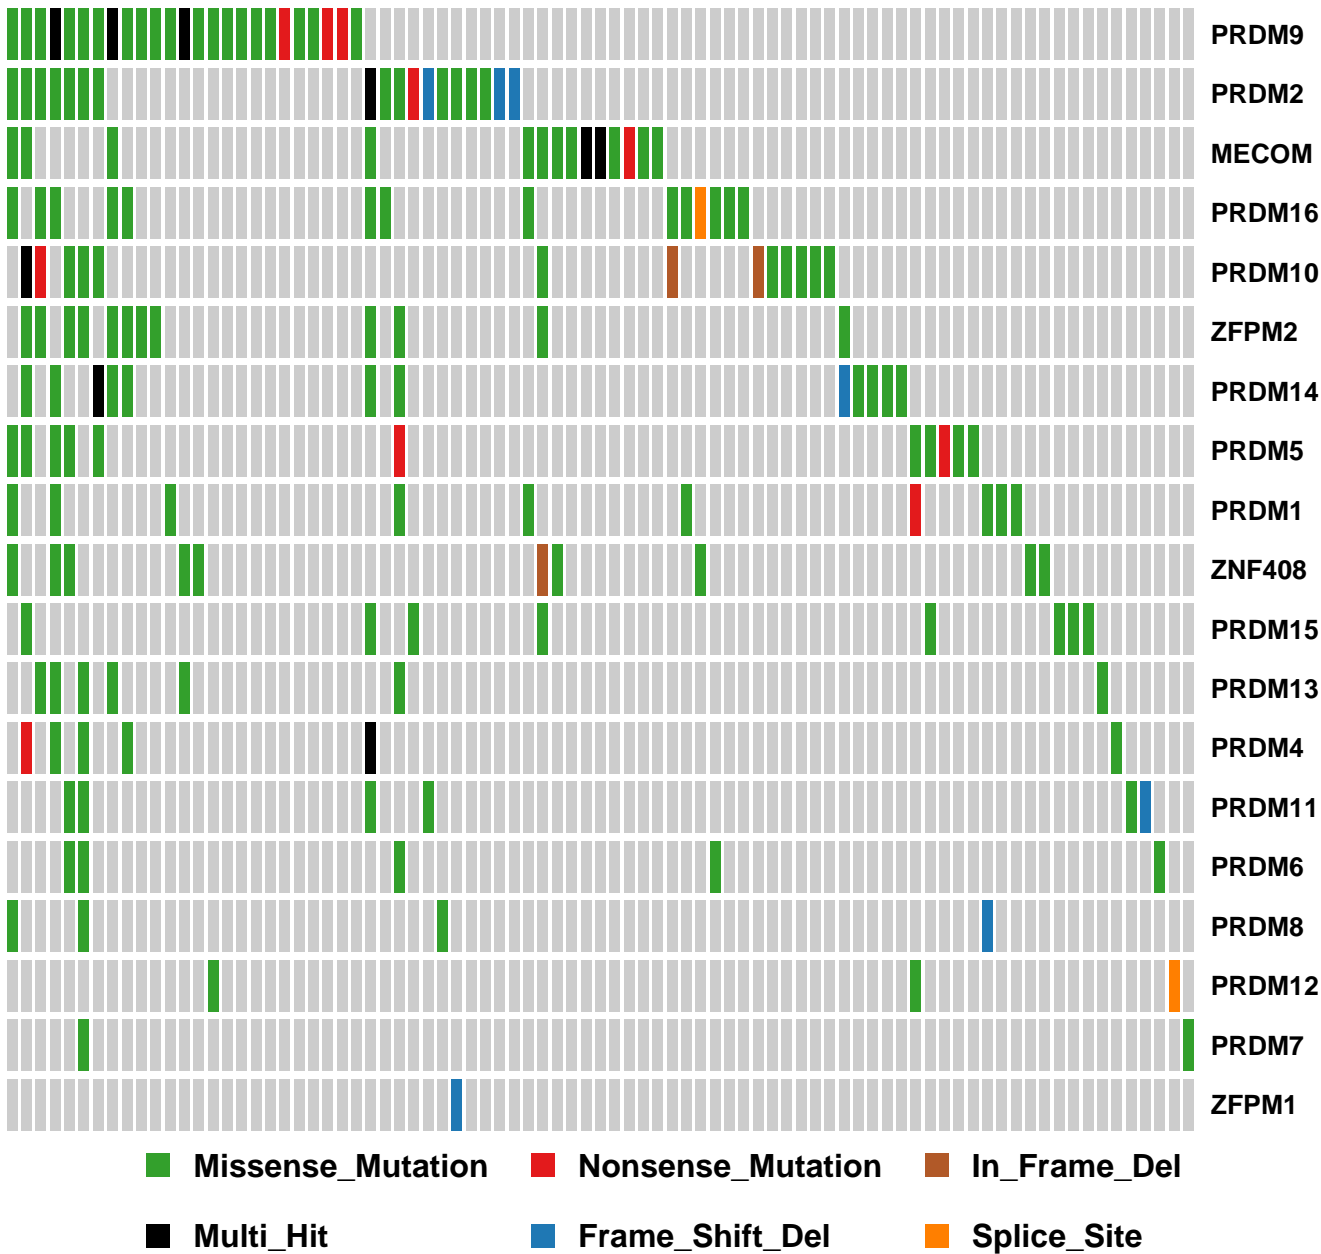

Altered in 13 (22.81%) of 57 samples.

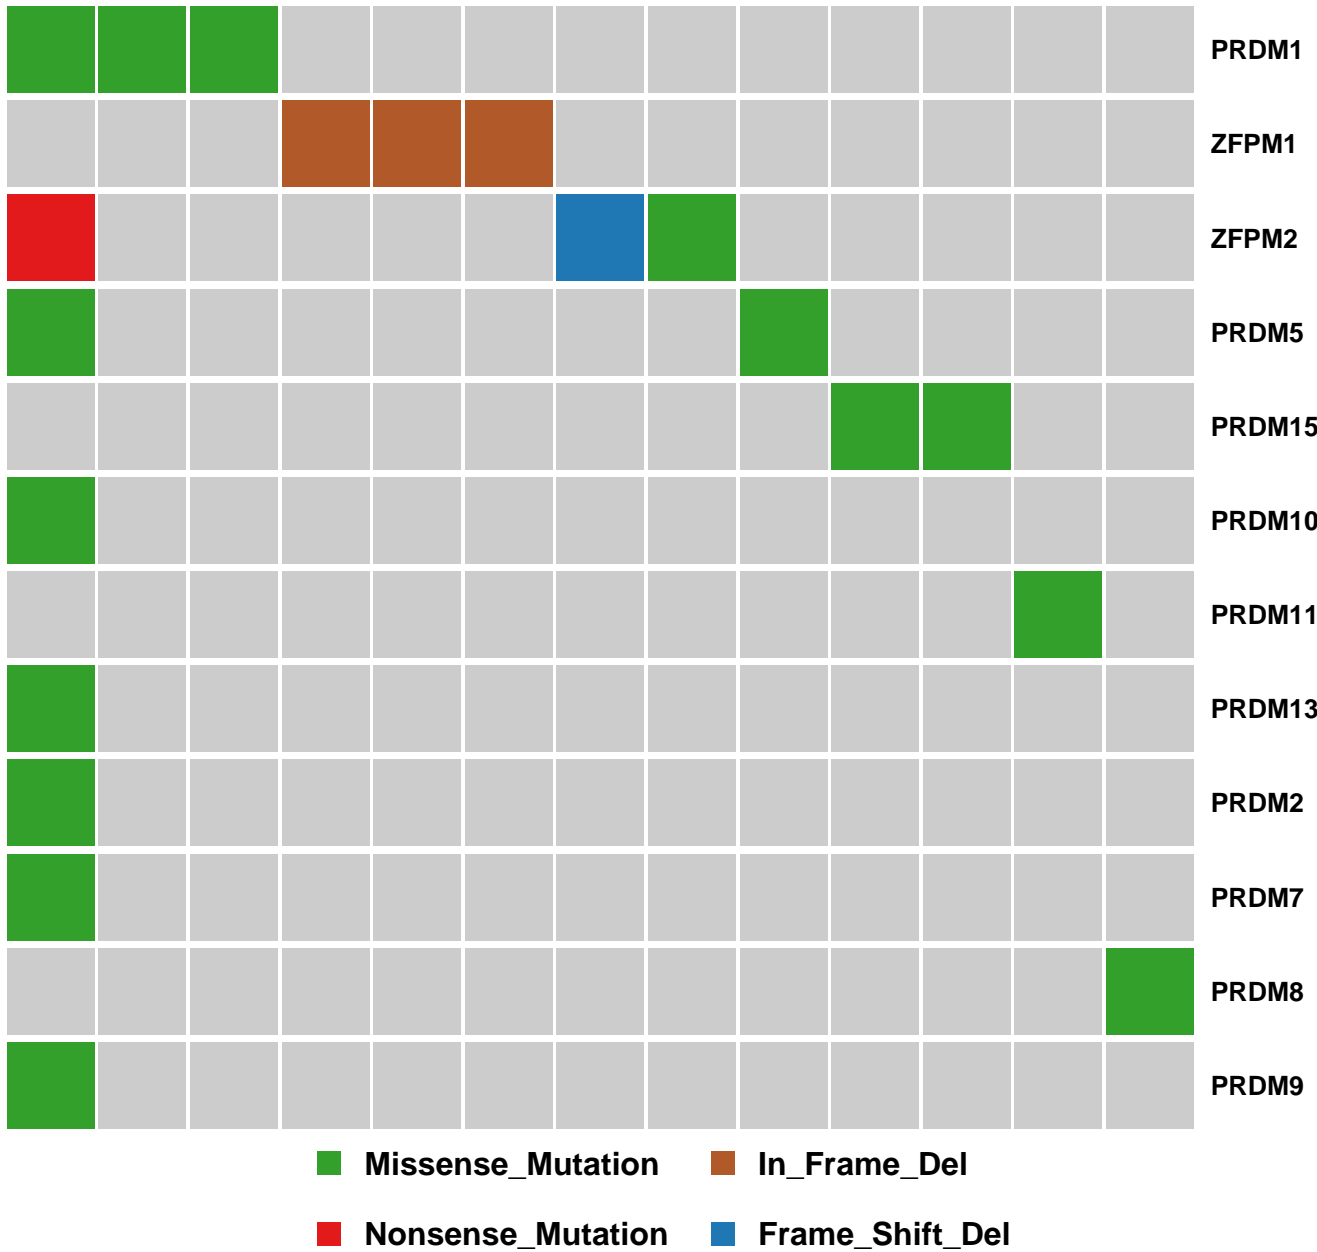

**Altered in 10 (12.5%) of 80 samples.**

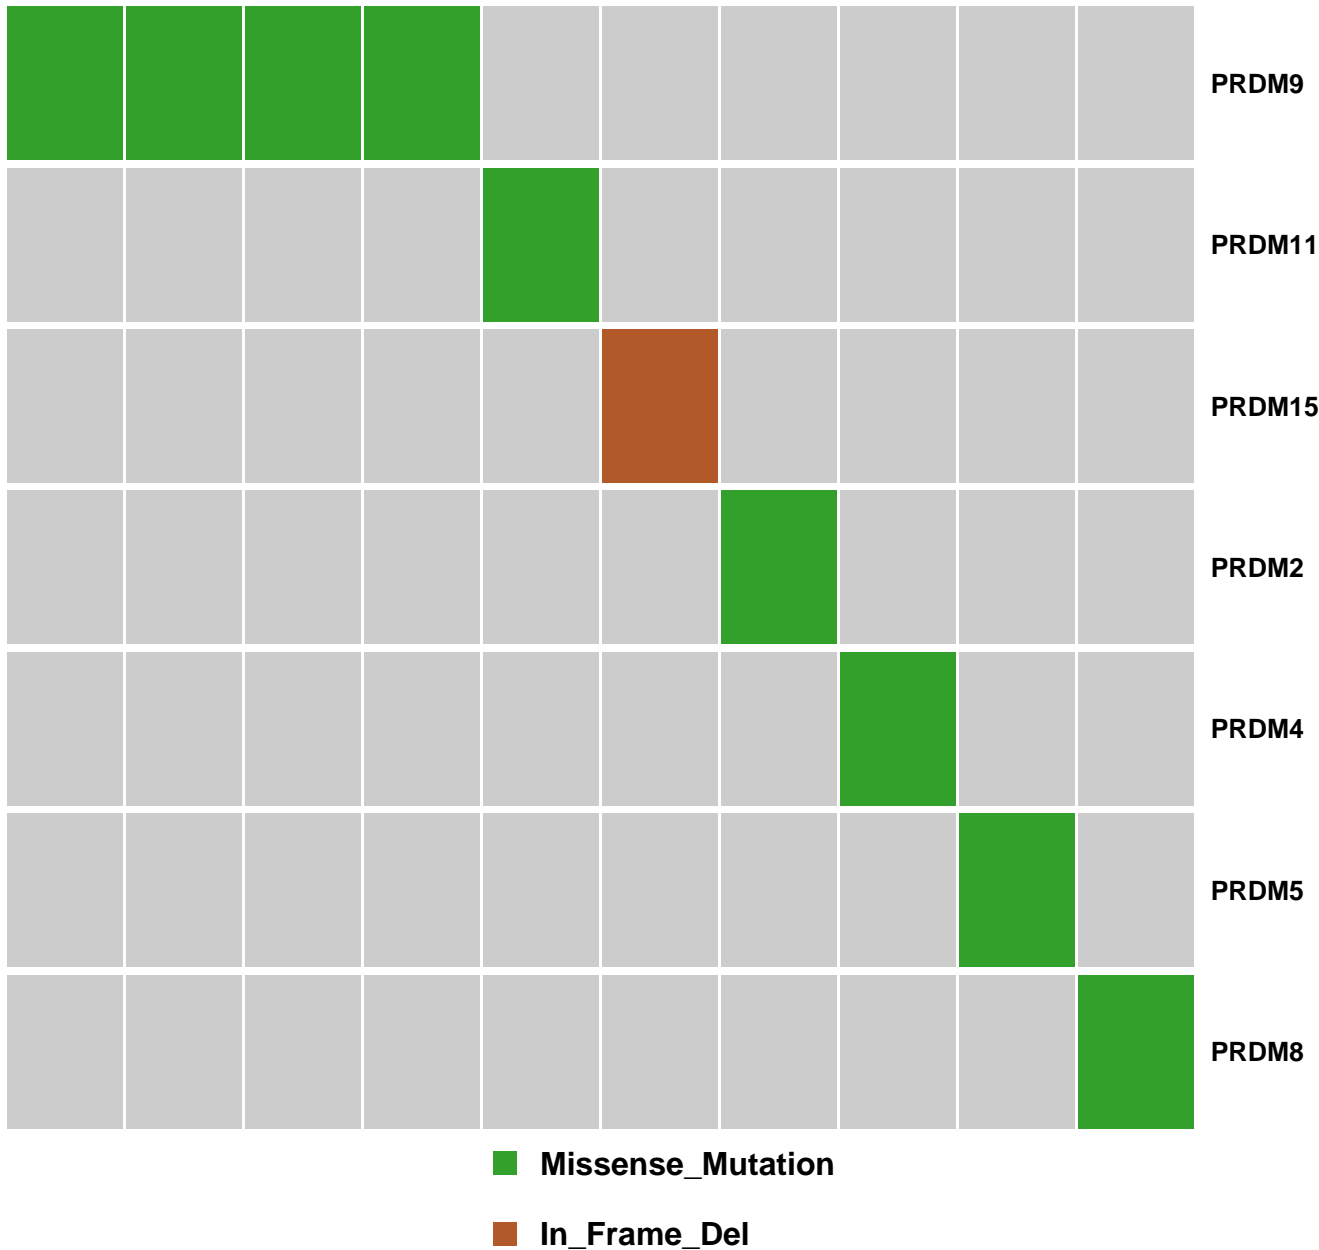

Supplement: s1 [file s1]
