# Supplementary figures and images for: PR/SET Domain Family and Cancer: Novel Insights from The Cancer Genome Atlas
Source: MDPI journal article supplement (doi:10.3390/ijms19103250), 2018-10-19

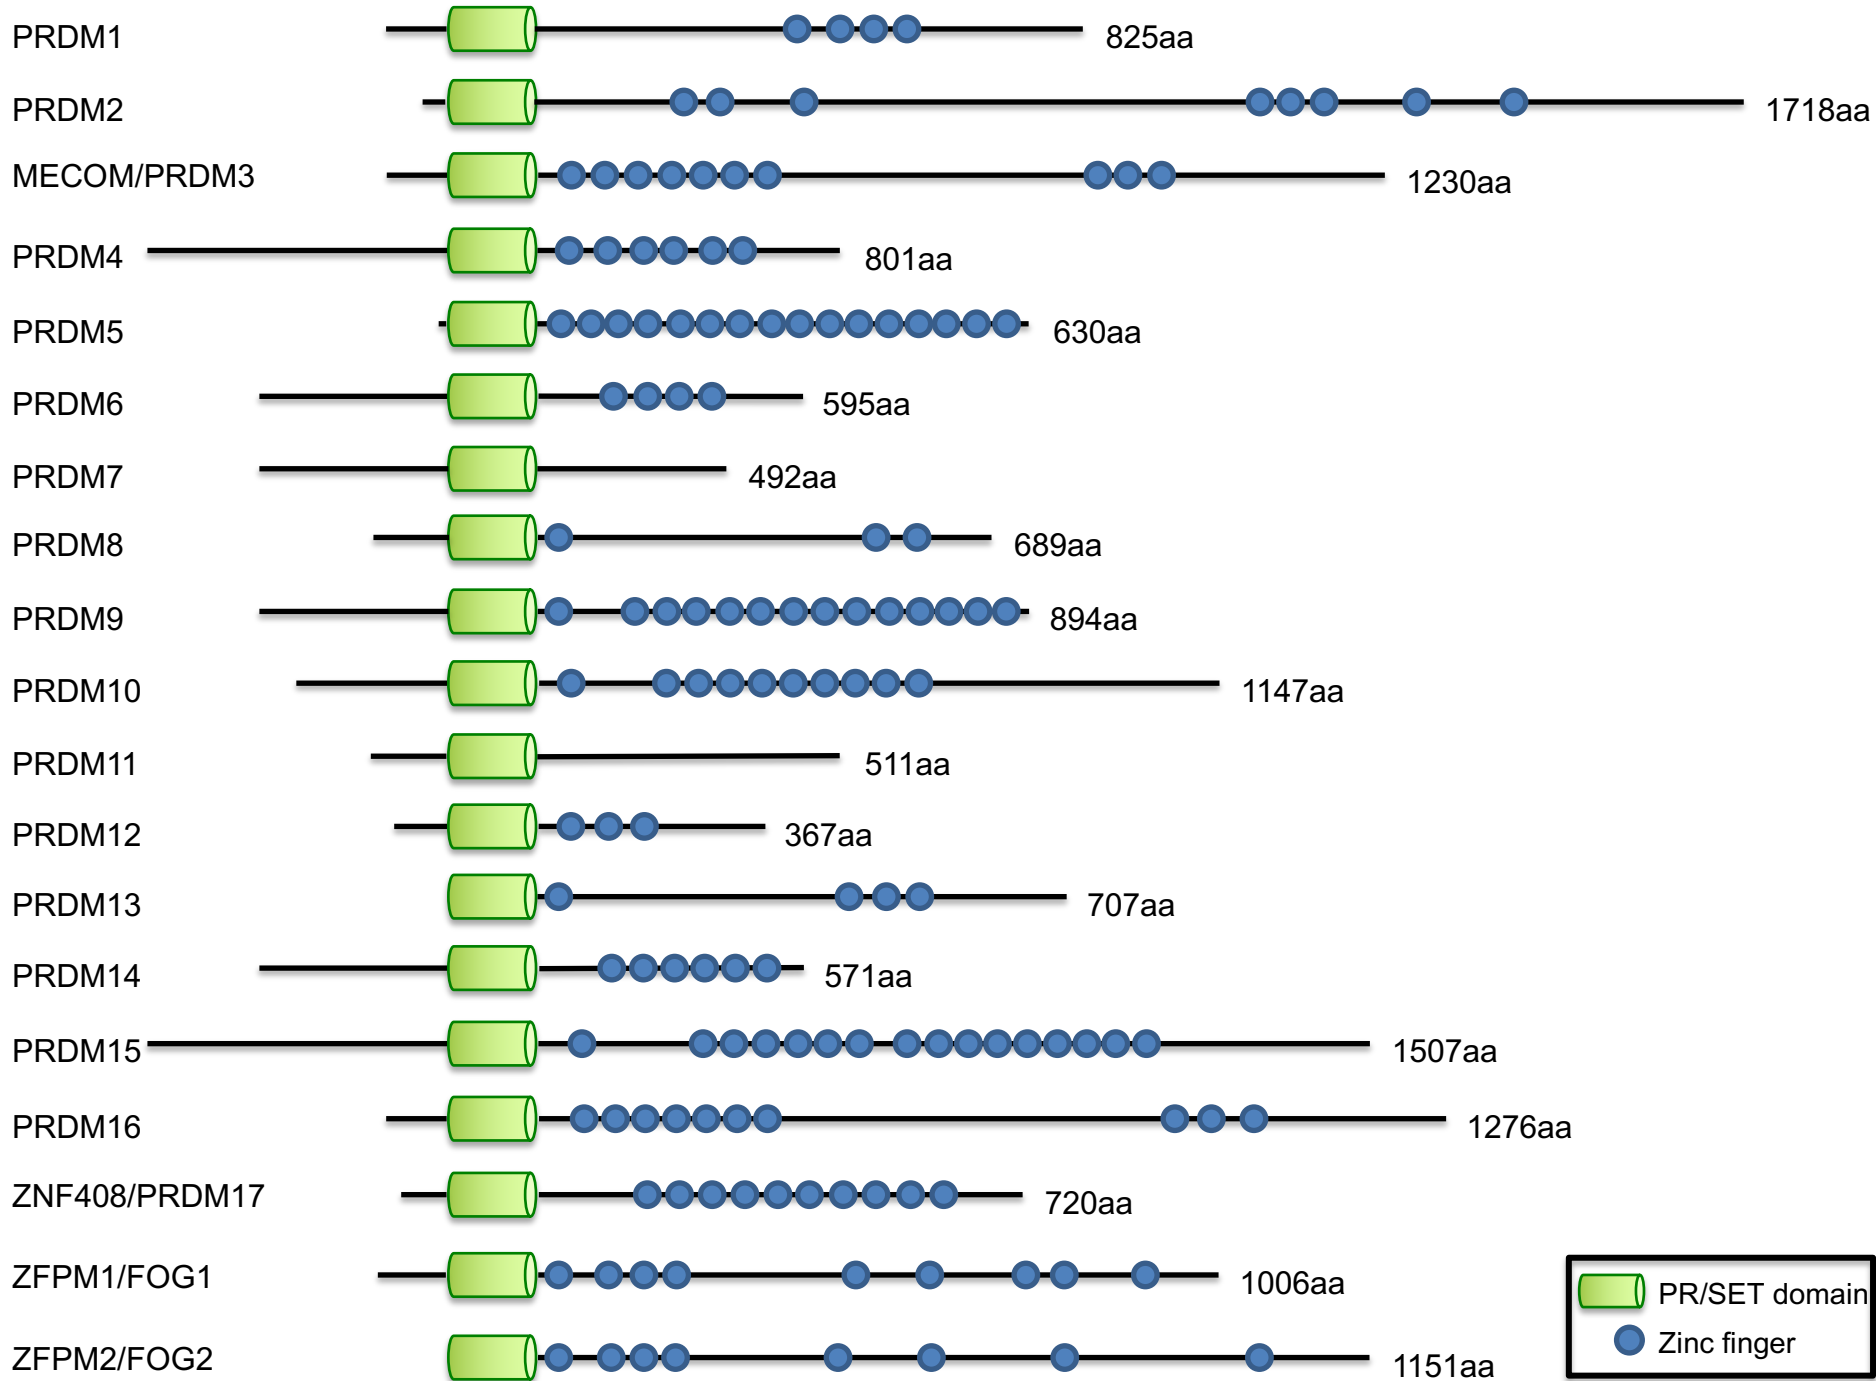

Supplement: s1 [file s1]

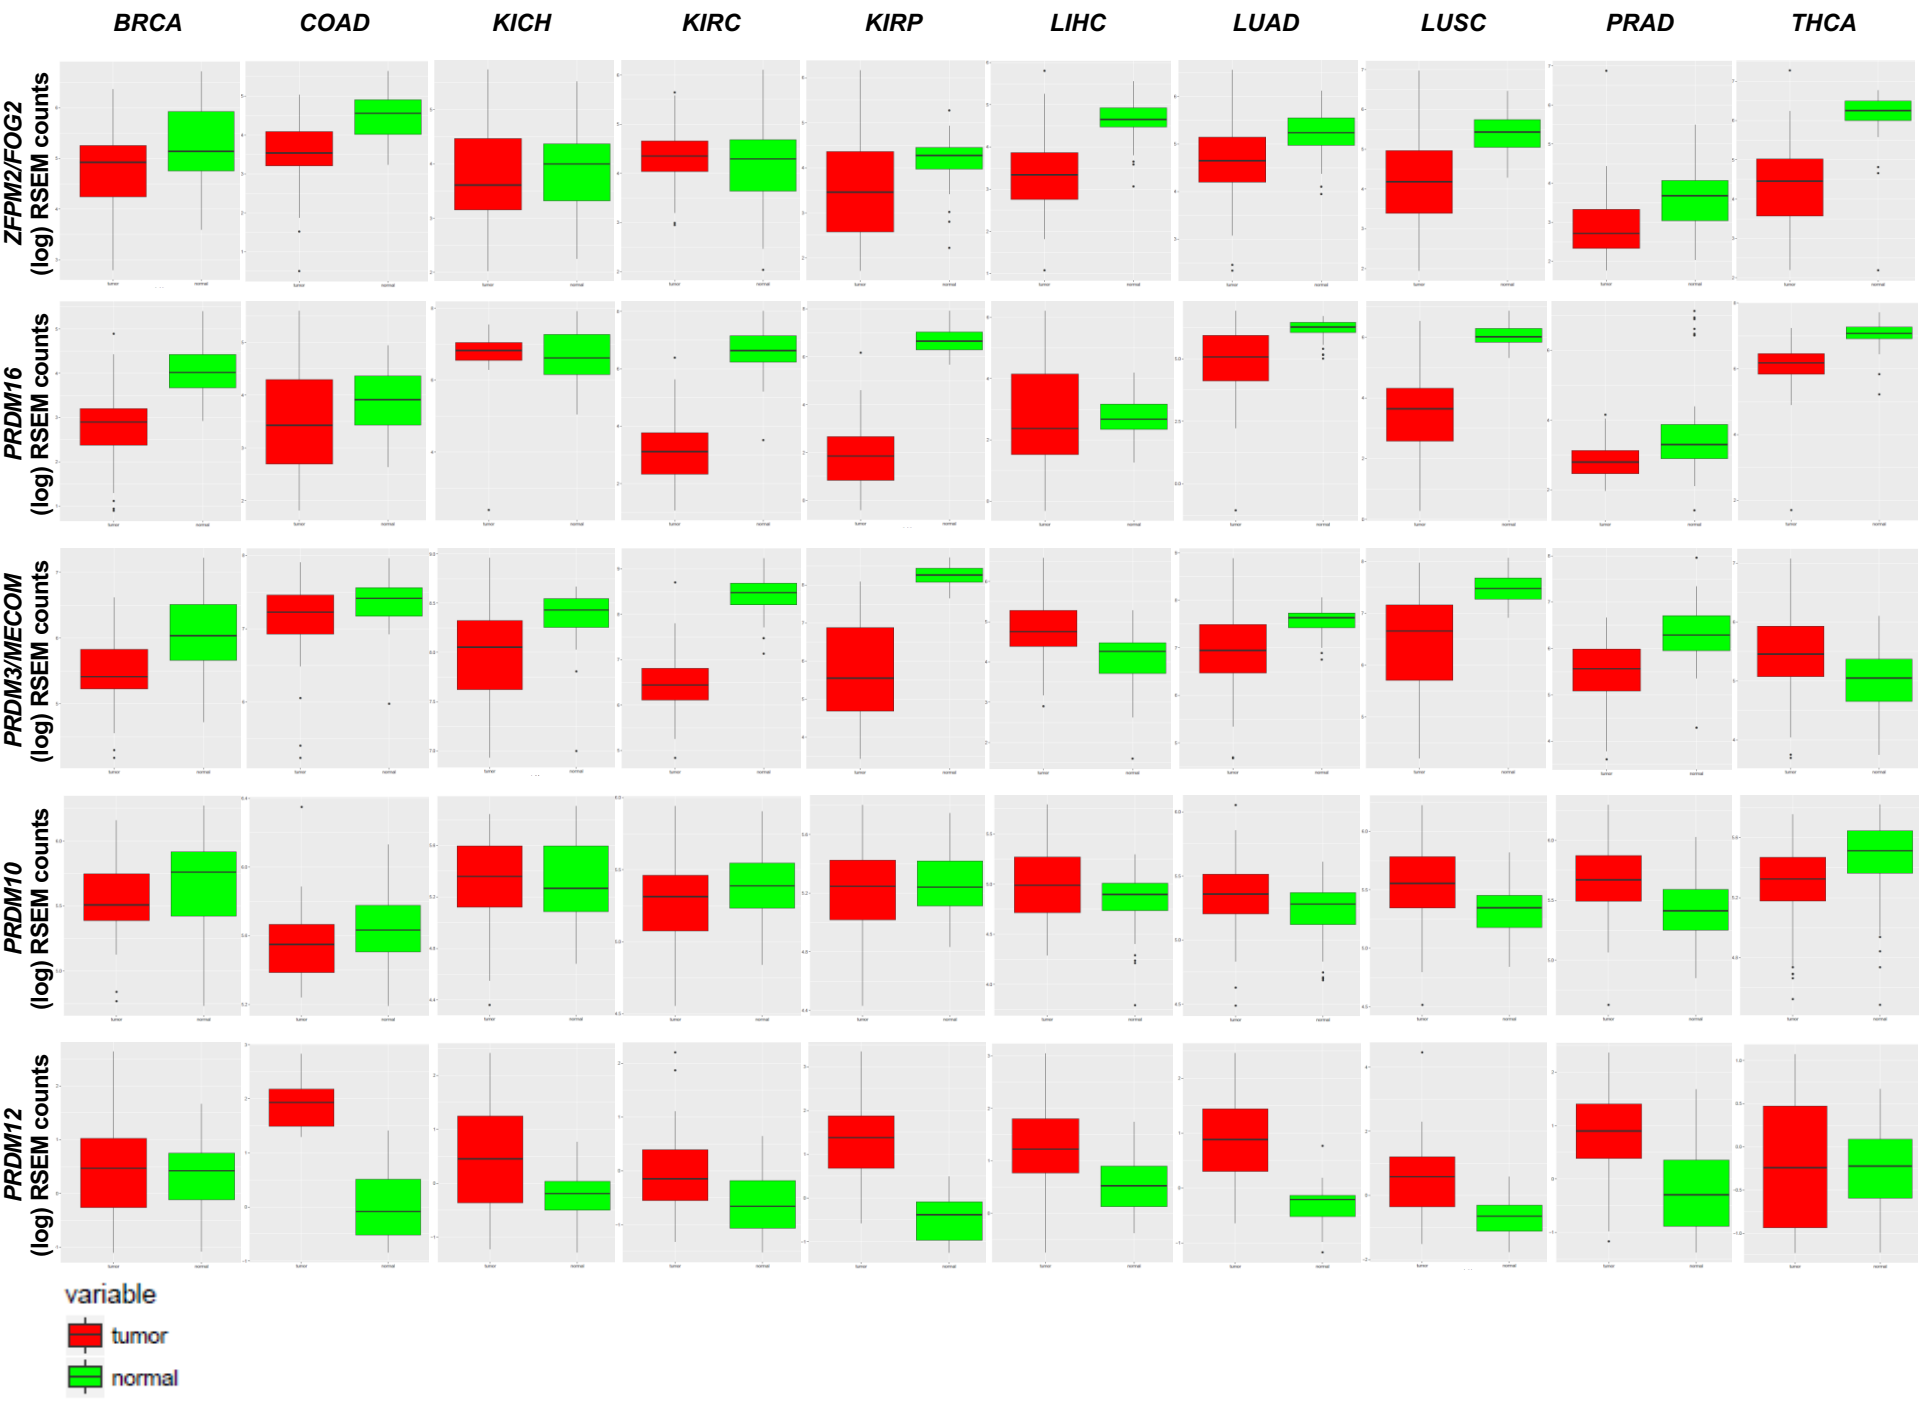

Supplement: s1 [file s1]

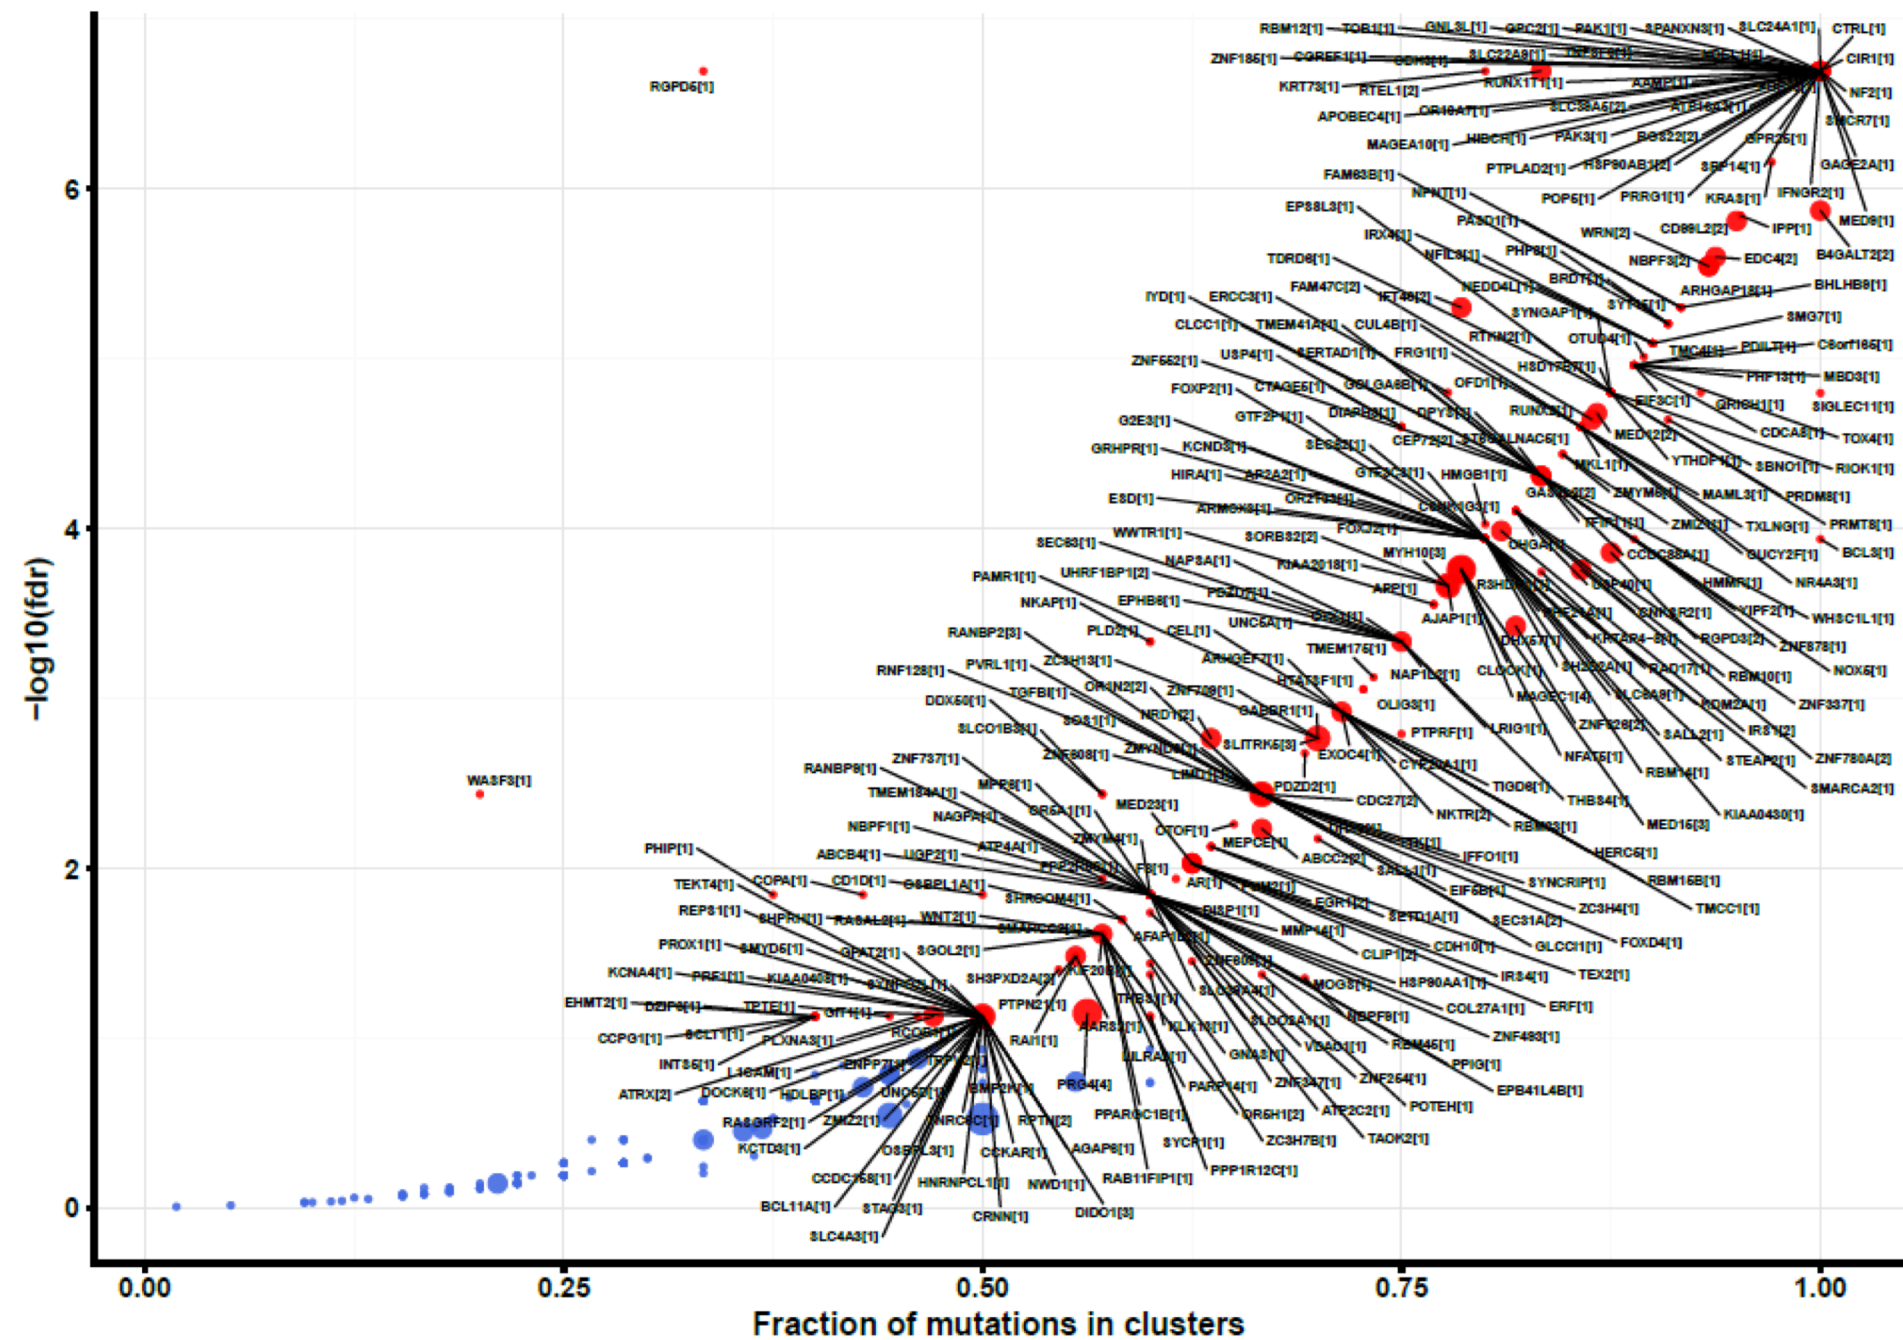

Supplement: s1 [file s1]
